# Supplementary material for: Genomic analyses of withers height and linear conformation traits in German Warmblood horses using imputed sequence-level genotypes
Source: Springer Nature journal article supplement (doi:10.1186/s12711-024-00914-6), 2024-06-13

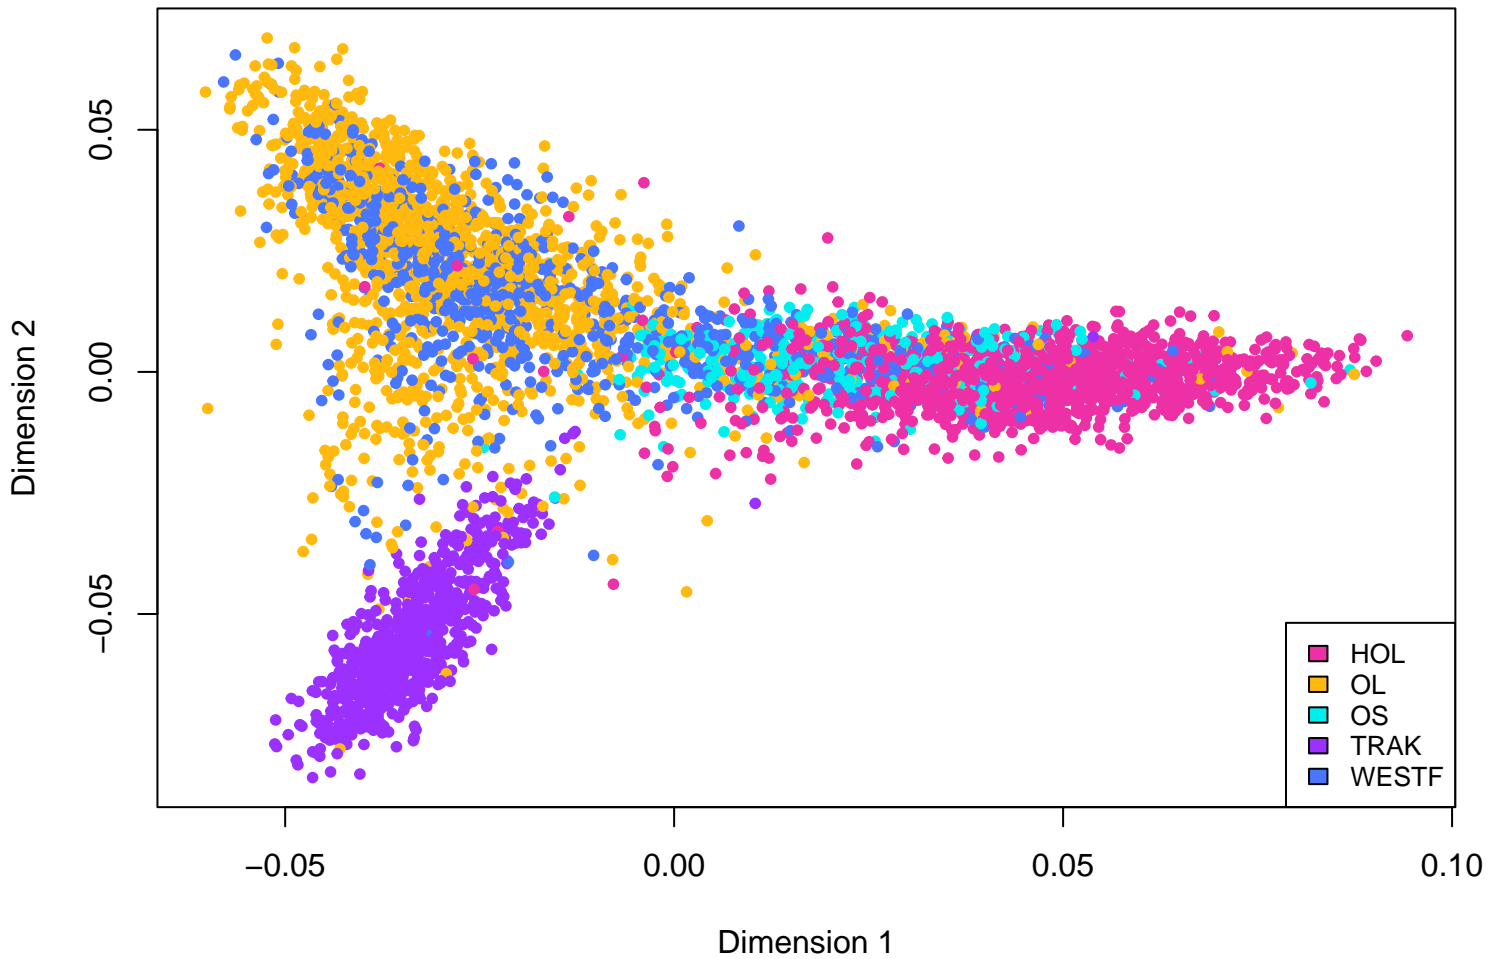

Supplement: MOESM1 [file 12711_2024_914_MOESM1_ESM.pdf]
