# Supplementary material for: Genomic analyses of withers height and linear conformation traits in German Warmblood horses using imputed sequence-level genotypes
Source: Springer Nature journal article supplement (doi:10.1186/s12711-024-00914-6), 2024-06-13
Supplement: MOESM6 [file 12711_2024_914_MOESM6_ESM.pdf]

### Breed type [plain - true to type]

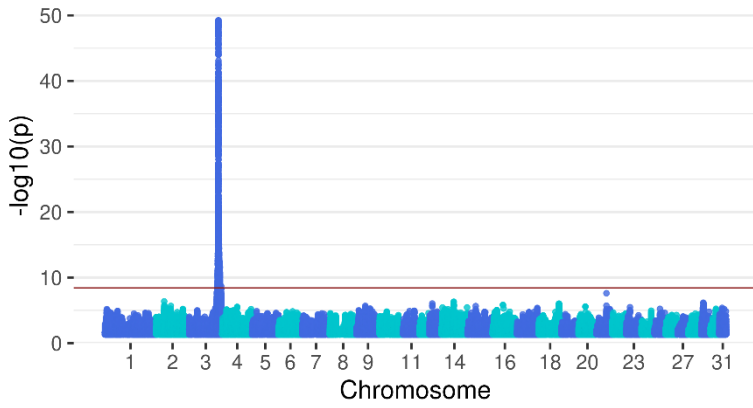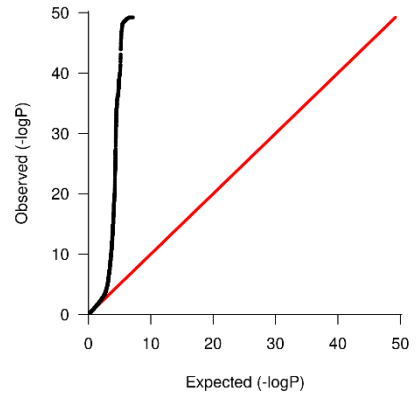

$$\lambda = 1.133$$

### Gender expression [weak - strong]

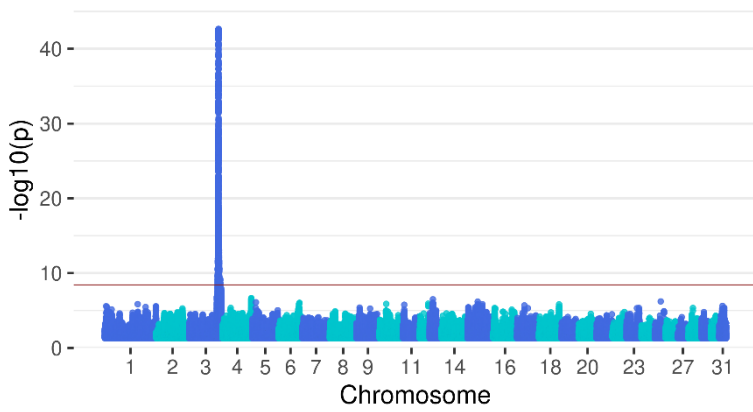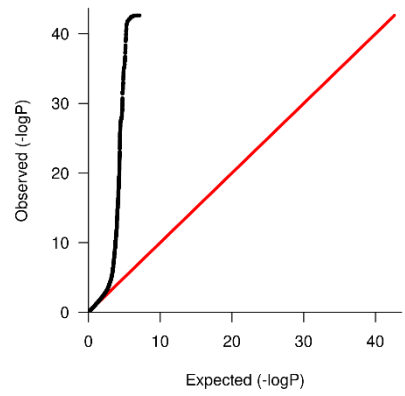

$$\lambda = 1.115$$

### Frame [small-framed - large-framed]

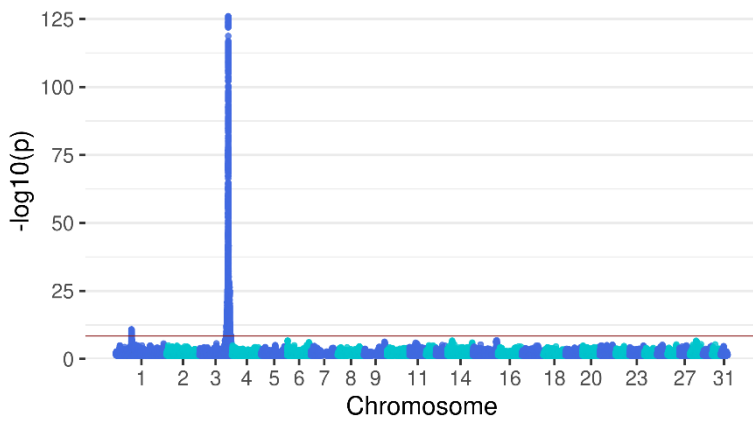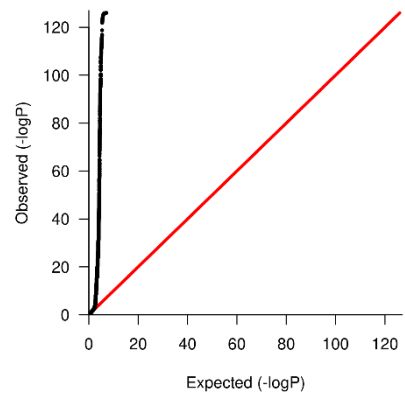

$$\lambda = 1.083$$

**Caliber [light - heavy]**

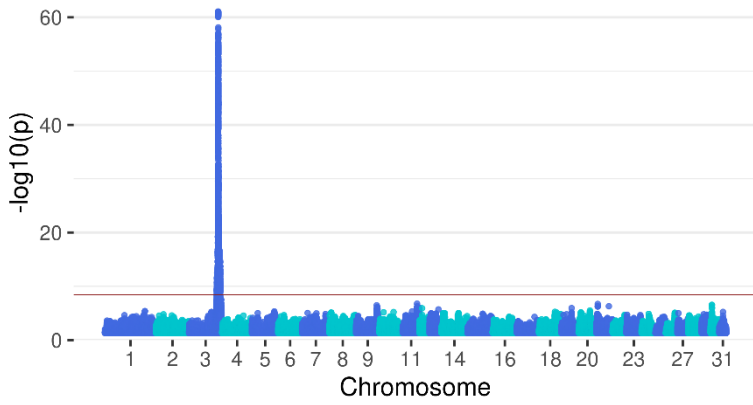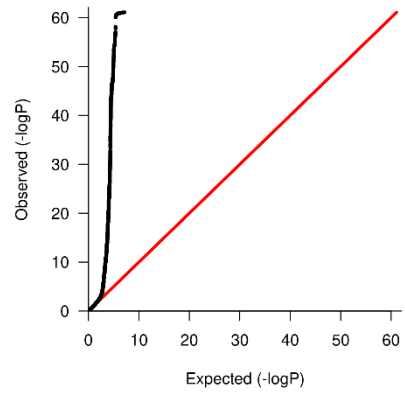

$\lambda = 1.018$

**Chest width [narrow - wide]**

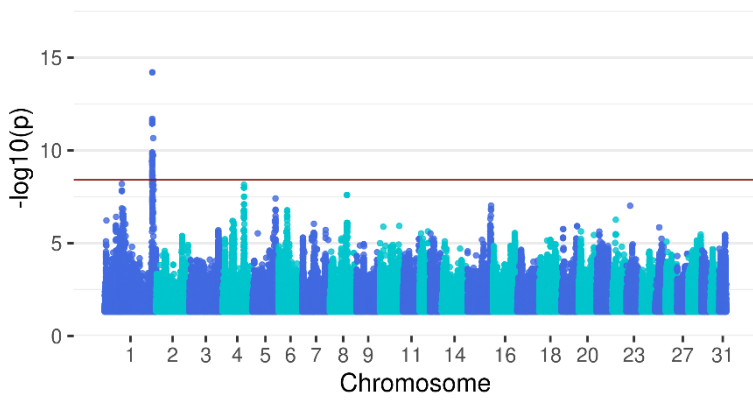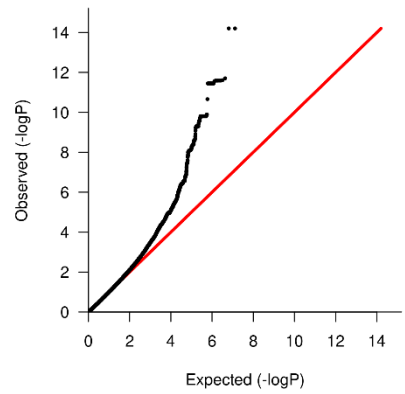

$\lambda = 0.945$

**Barrel [shallow (tucked-up) - deep]**

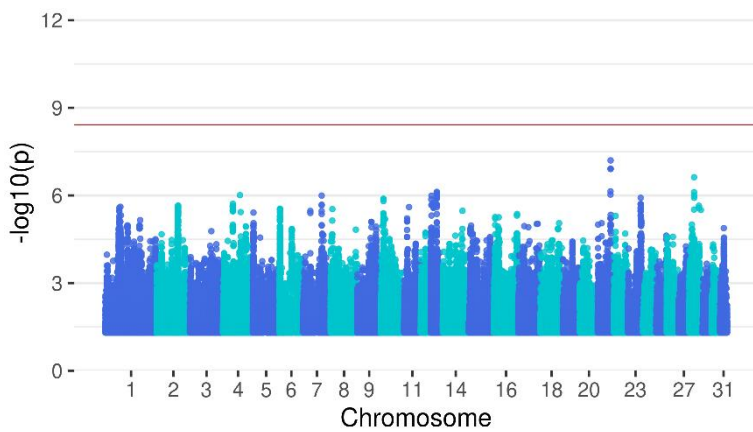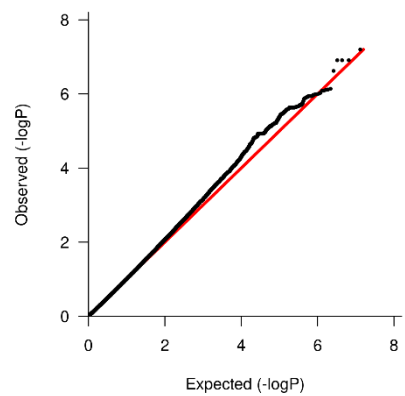

$\lambda = 0.983$

### Condition [skinny - fat]

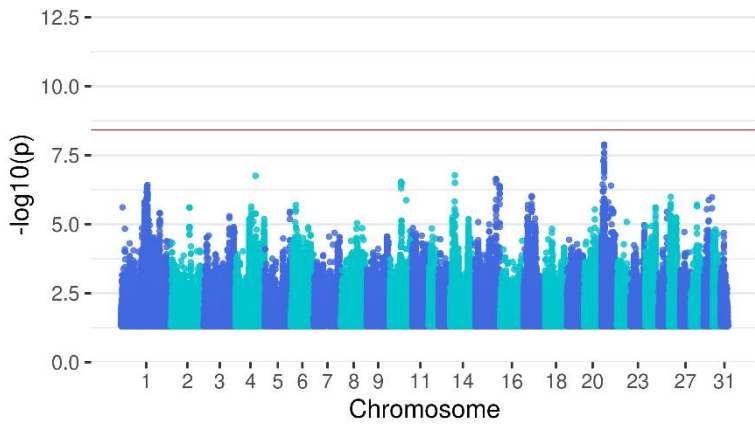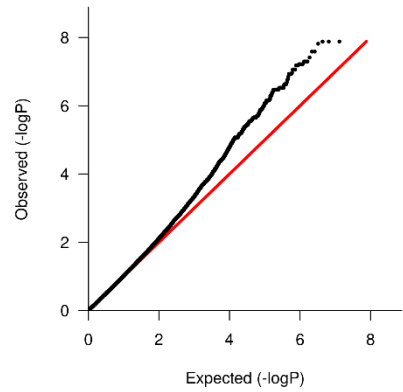

$$\lambda = 1.001$$

### Development [poor - much]

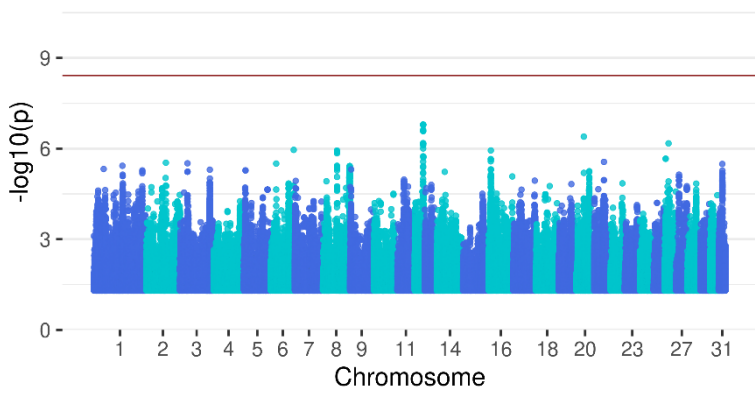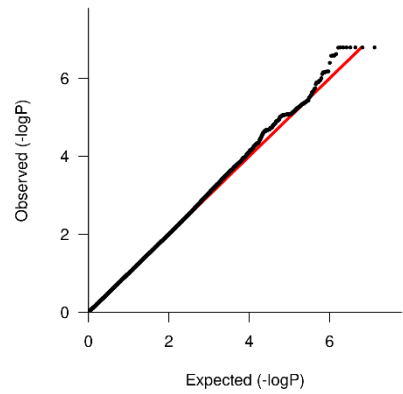

$$\lambda = 0.994$$

### Length of legs [short-legged - long-legged]

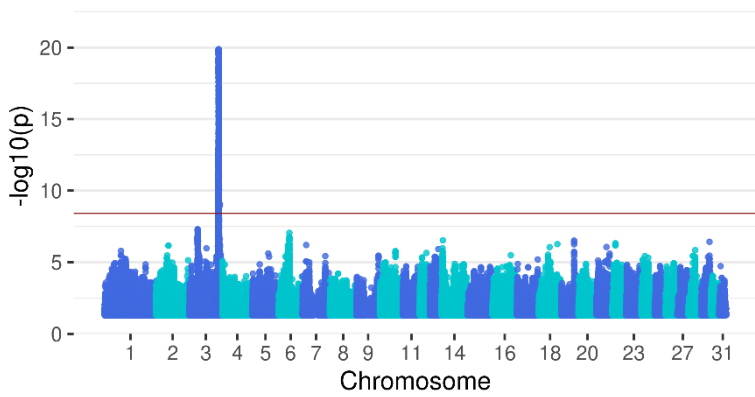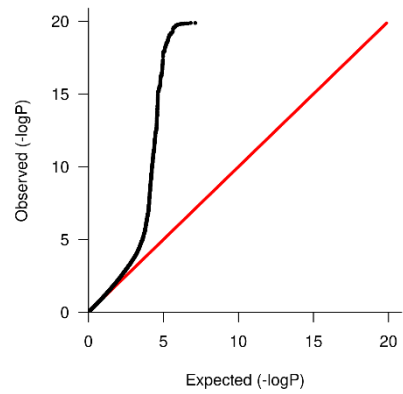

$$\lambda = 1.061$$

### Harmony of proportions [unharmonious - harmonious]

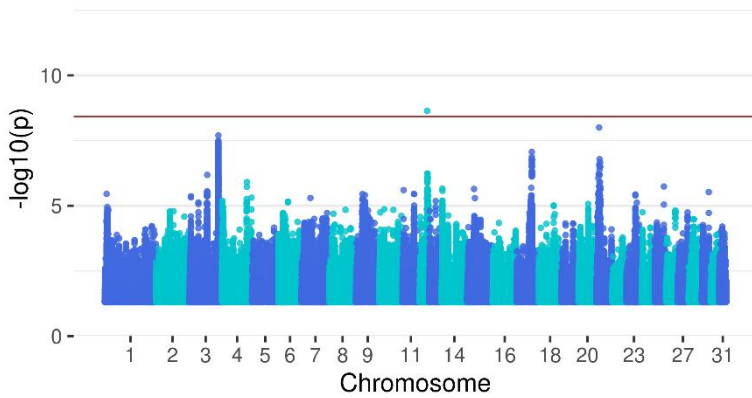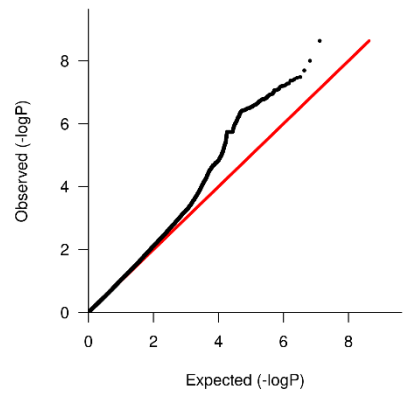

$\lambda = 1.024$

### Body shape [square - (long-)rectangular]

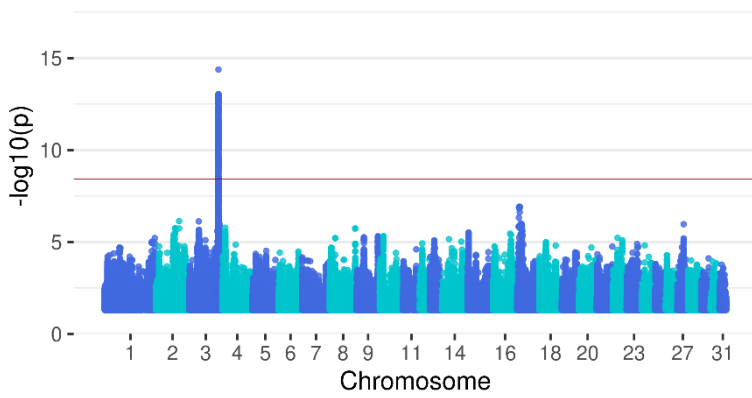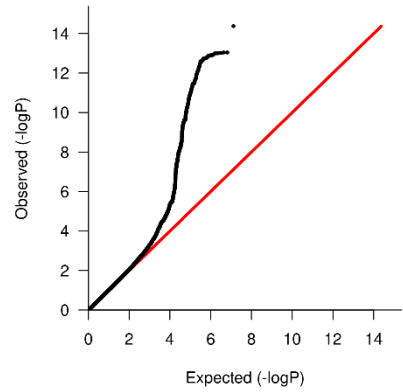

$\lambda = 0.996$

### Body direction [downhill - uphill]

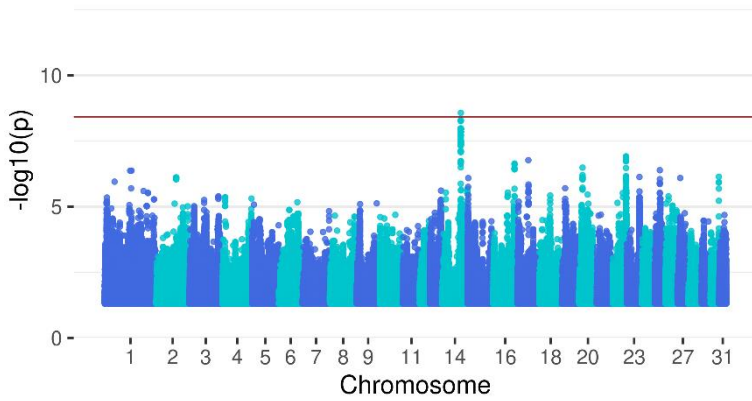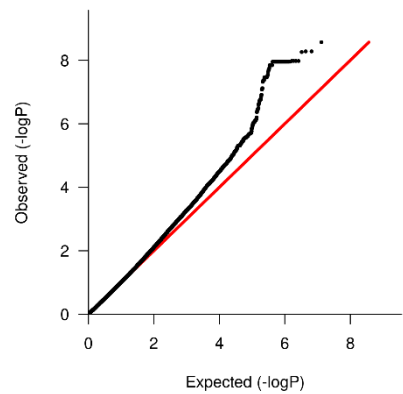

$\lambda = 0.989$

### Head shape [coarse - fine]

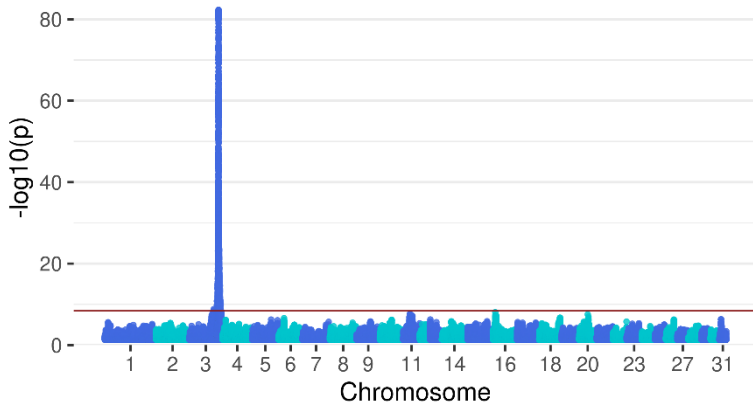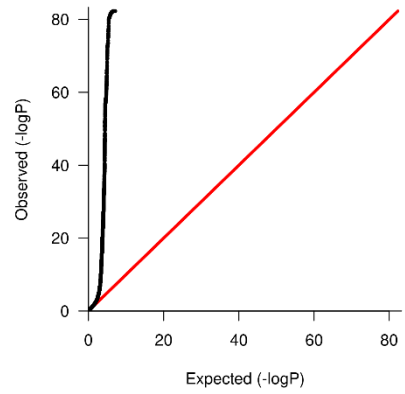

$$\lambda = 1.181$$

### Head length [short - long]

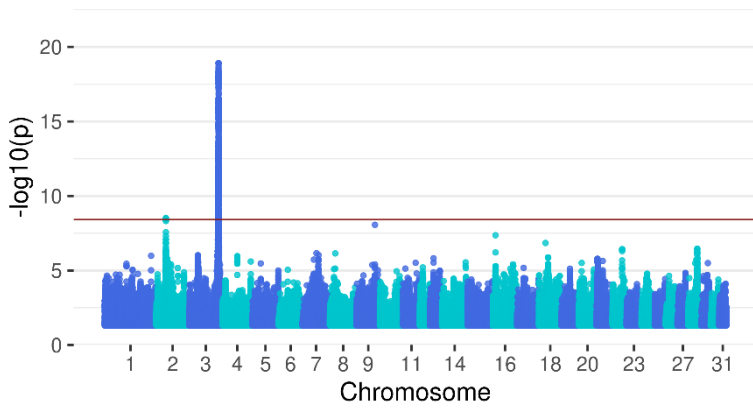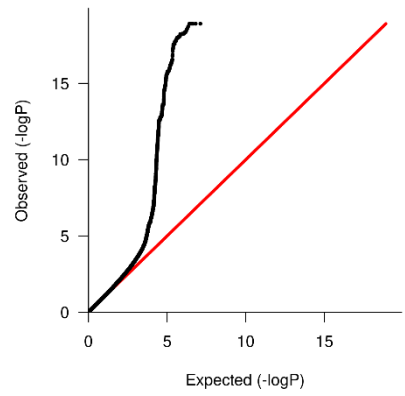

$$\lambda = 1.035$$

### Eye size [small - large]

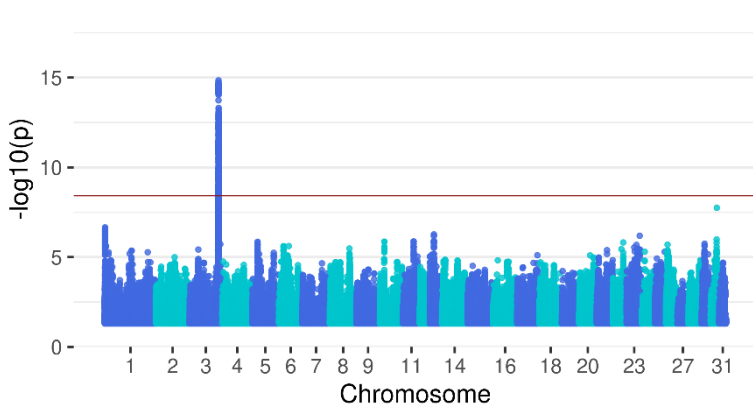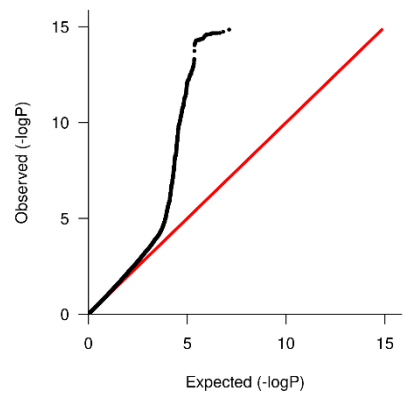

$$\lambda = 1.057$$

### Eye colour [white in the eye]

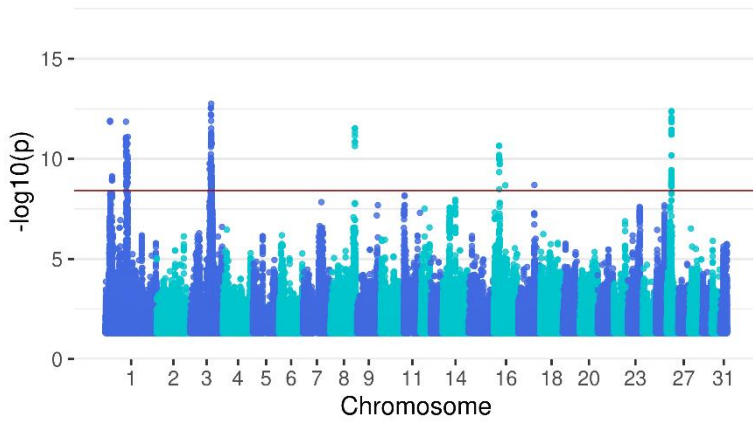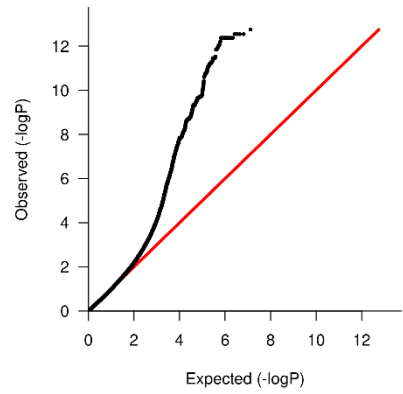

$$\lambda = 0.932$$

### Head-neck connection [heavy - light]

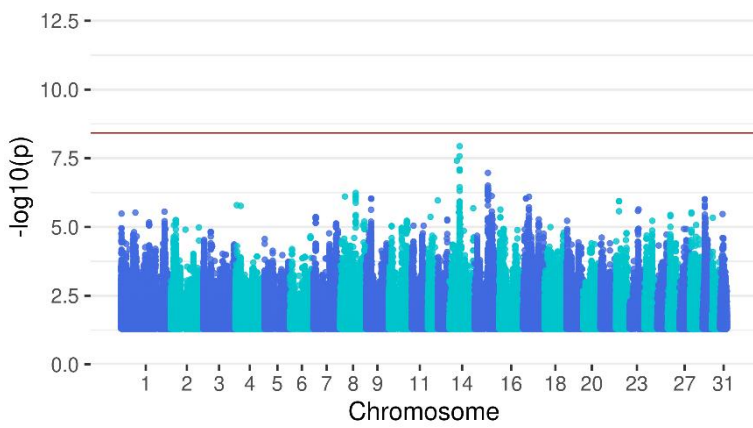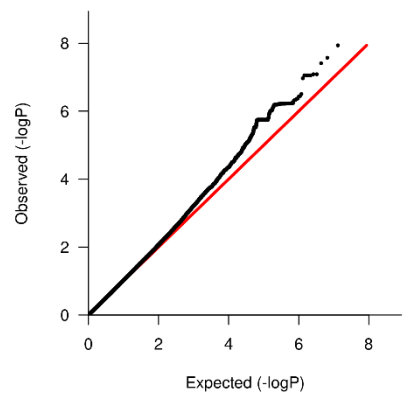

$$\lambda = 1.009$$

### Cheeks (jowl) [heavy - light]

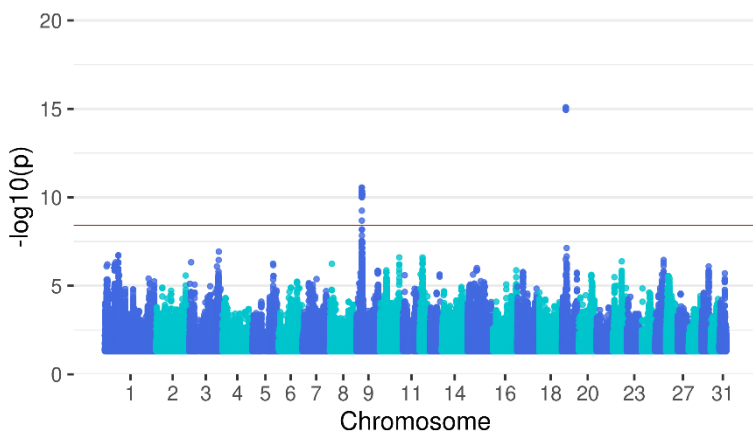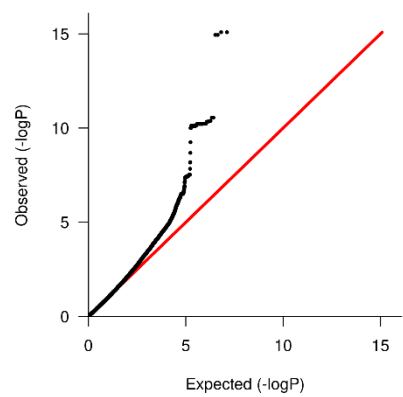

$$\lambda = 0.978$$

### Length of neck [short - long]

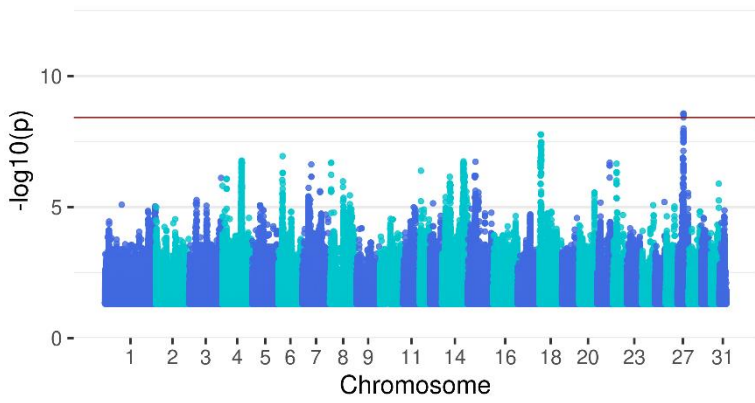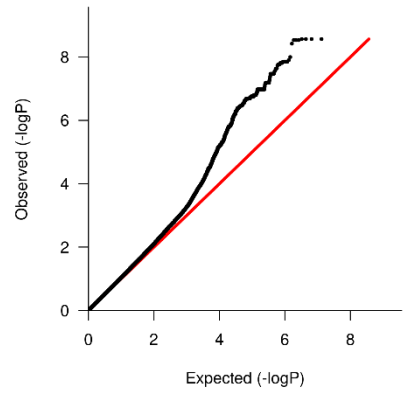

$\lambda = 1.041$

### Set of neck [low - high]

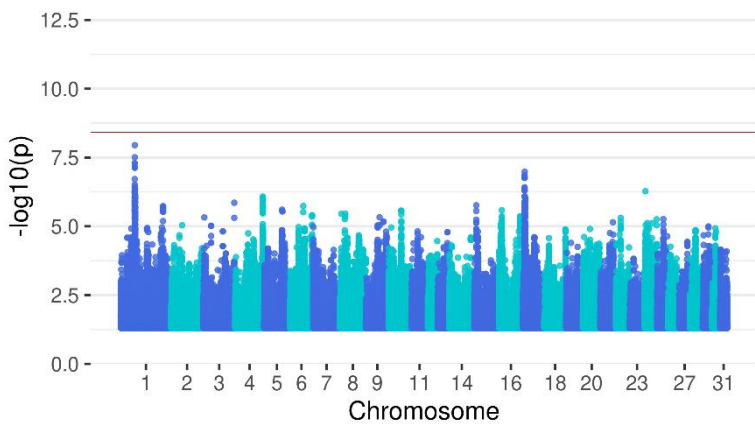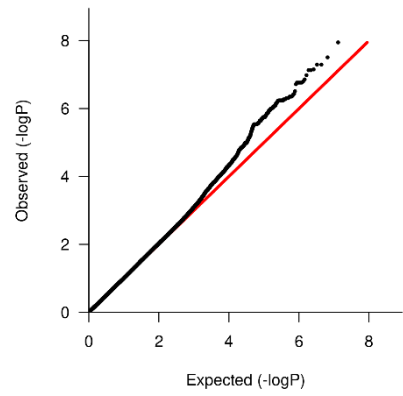

$\lambda = 1.002$

### Muscling area of neck [ewe-necked - top line dominated neck]

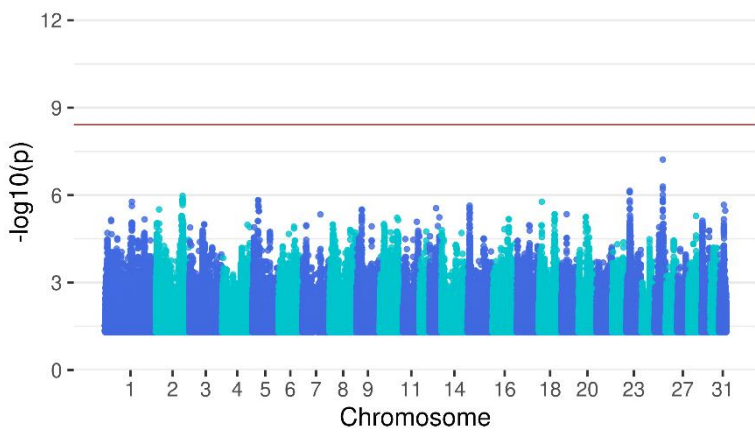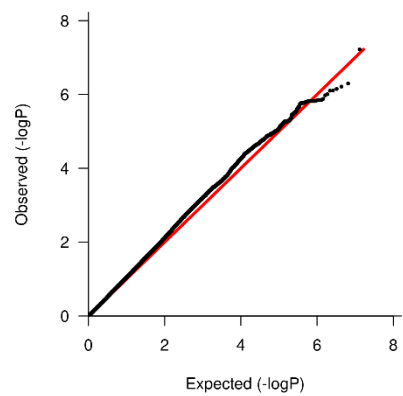

$\lambda = 1.054$

### Shape of neck [straight - arched]

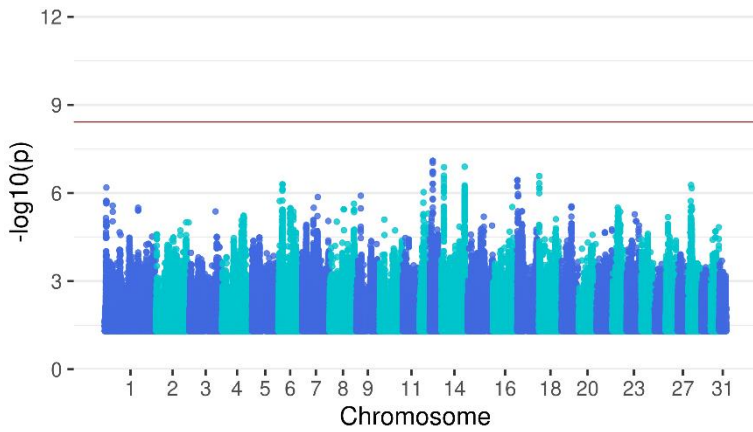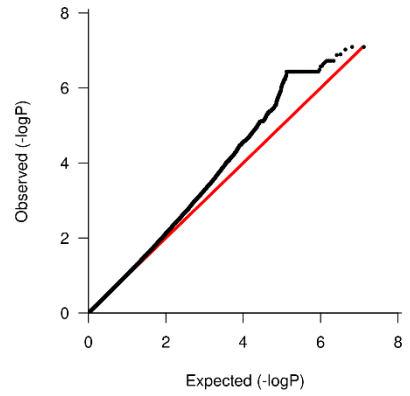

$$\lambda = 1.013$$

### Shape of neck [thin - thick]

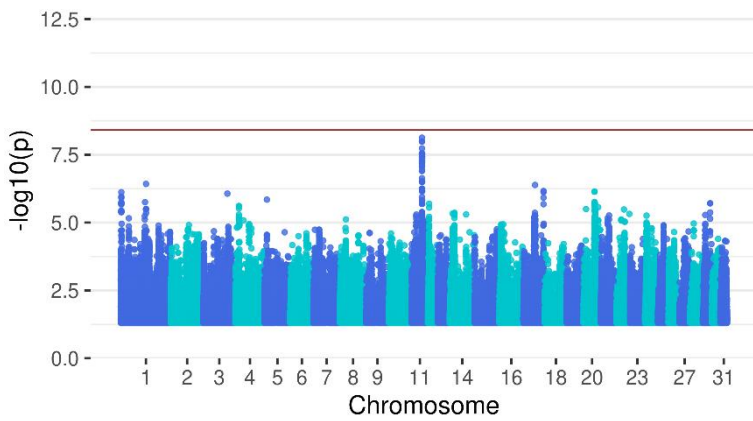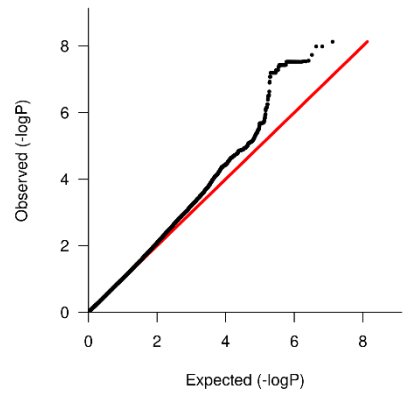

$$\lambda = 1.017$$

### Neck connection to withers [marked notch/dip]

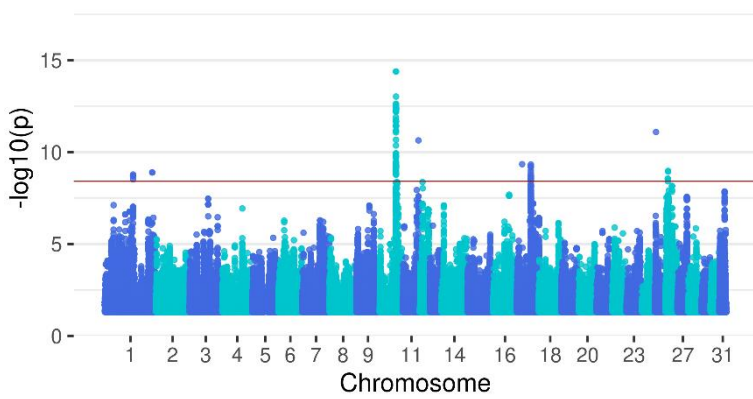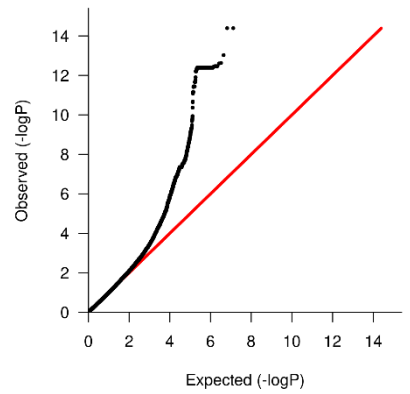

$$\lambda = 0.984$$



### Length of withers [short - long]

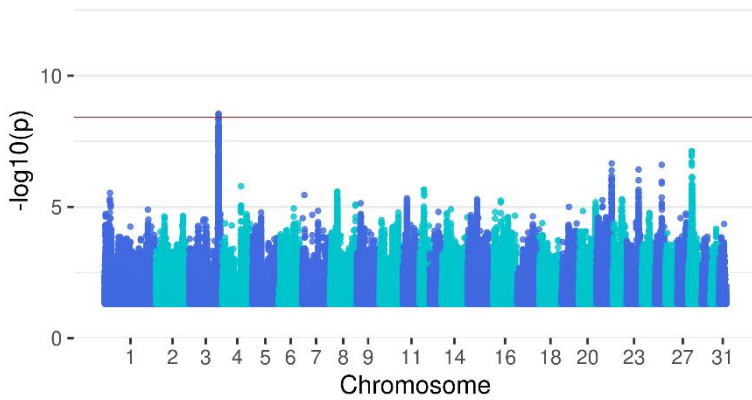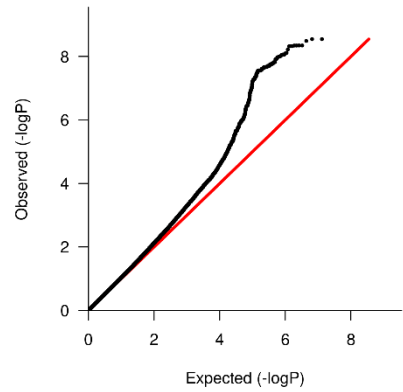

$$\lambda = 1.046$$

### Height of withers [flat - high]

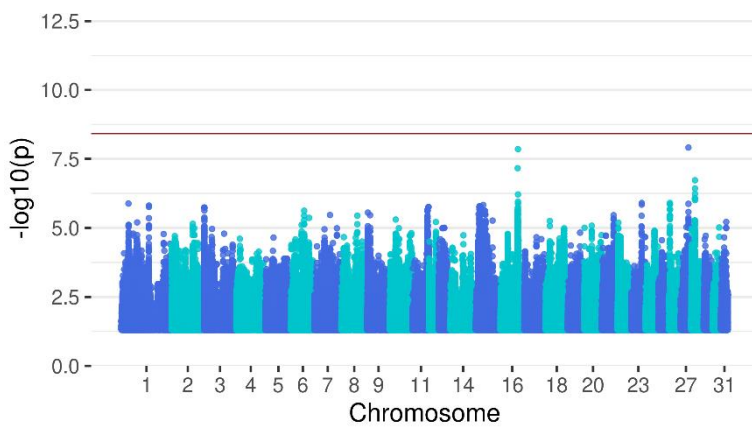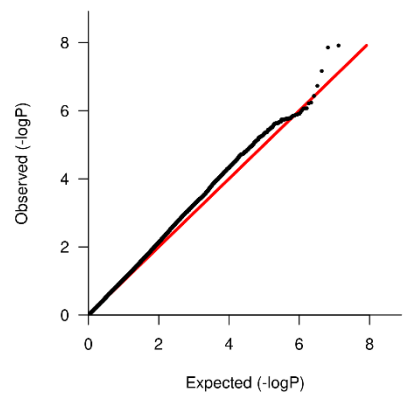

$$\lambda = 1.062$$

### Length of shoulder [short - long]

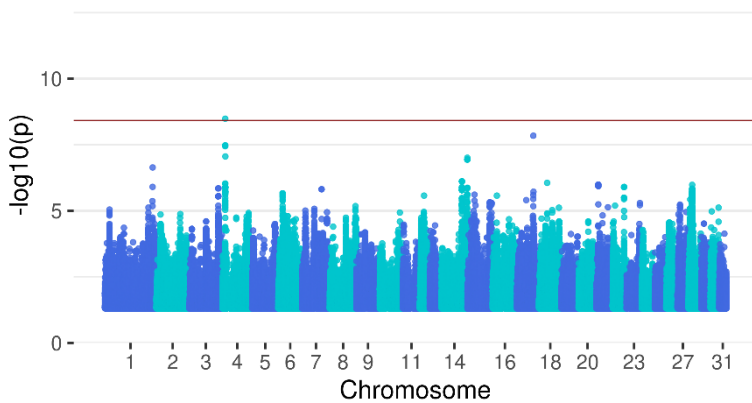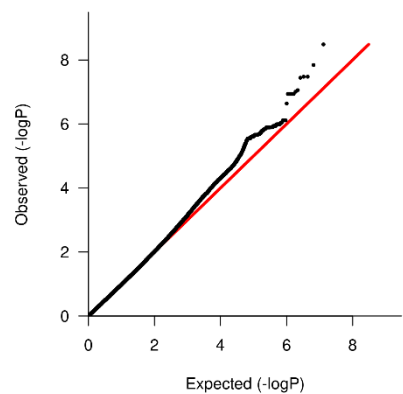

$$\lambda = 0.974$$

### Shoulder position [clearly pushed forward]

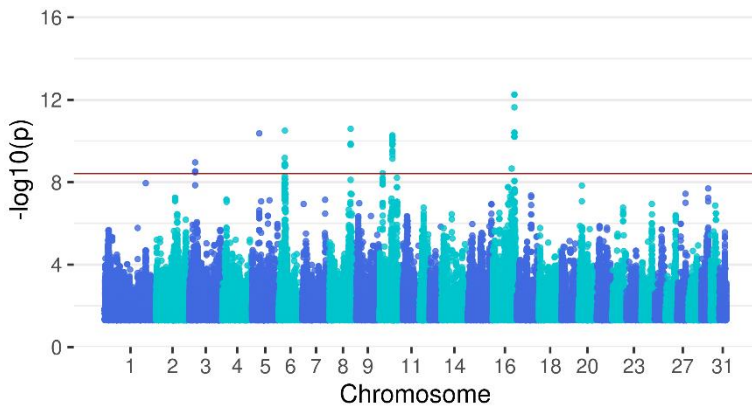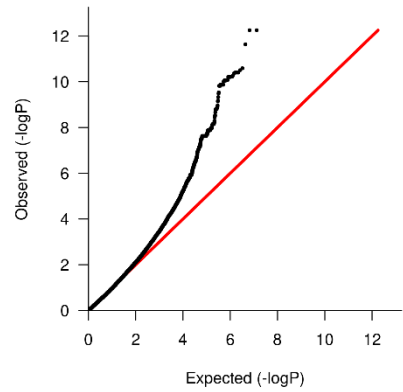

$$\lambda = 0.913$$

### Course of topline [disturbed - straight]

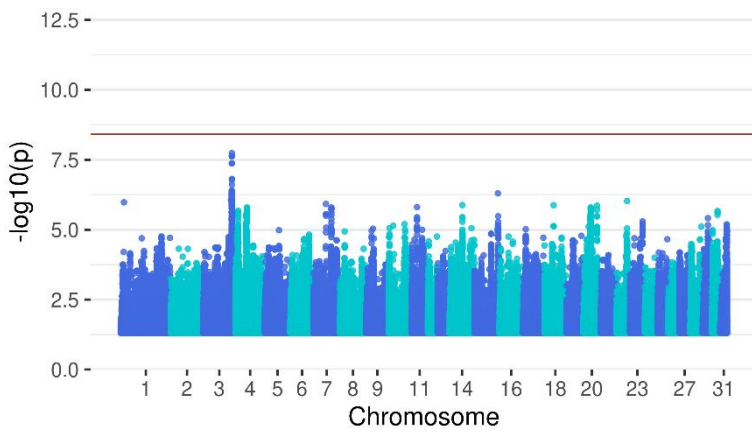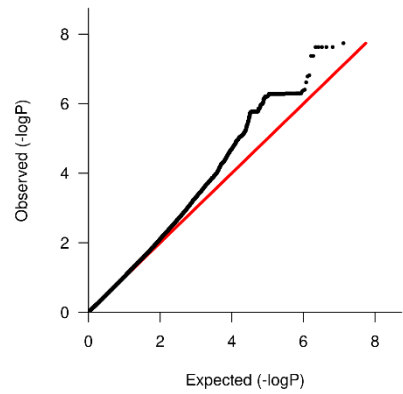

$$\lambda = 1.014$$

### Length of back [short - long]

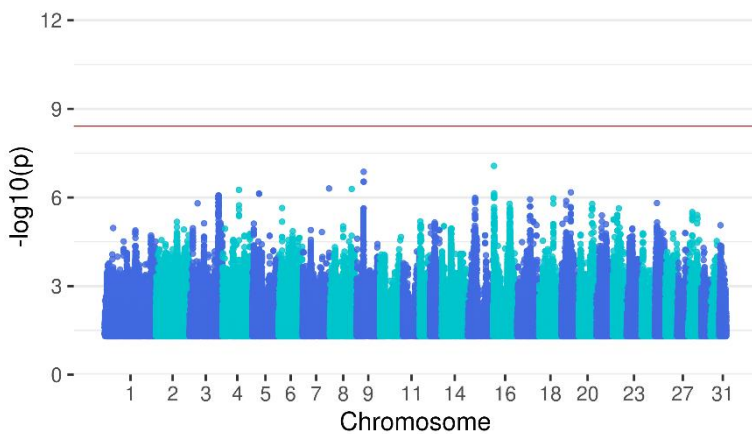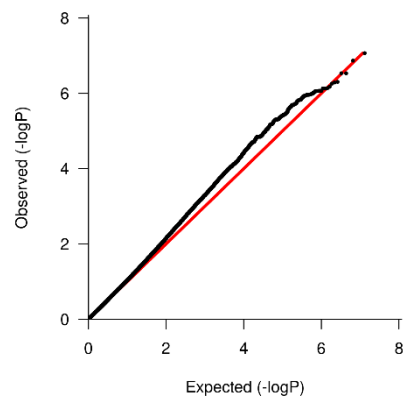

$$\lambda = 1.031$$

### Line (strength) of back [dipped - roached]

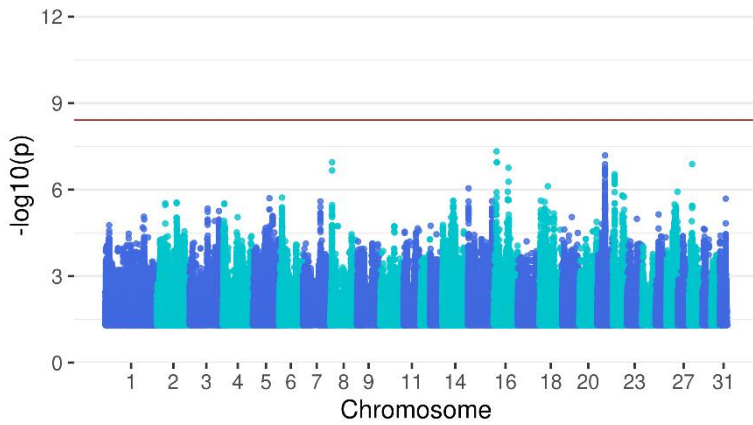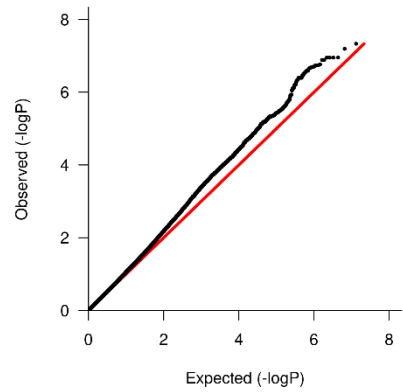

$\lambda = 1.055$

### Line (strength) of loins [dipped (weak) - roached]

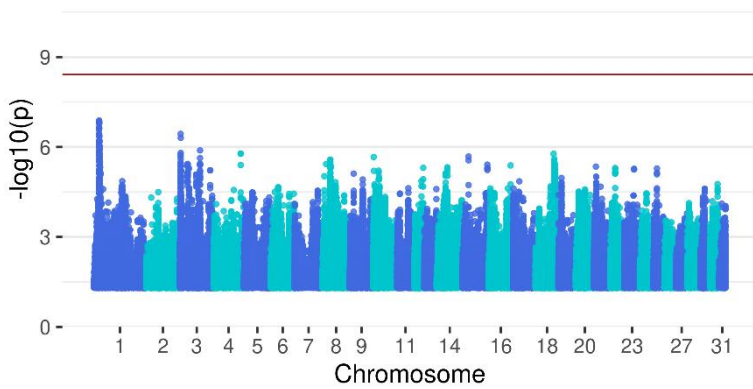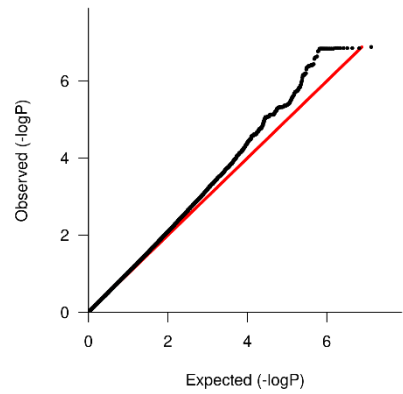

$\lambda = 1.039$

### Length of croup [short - long]

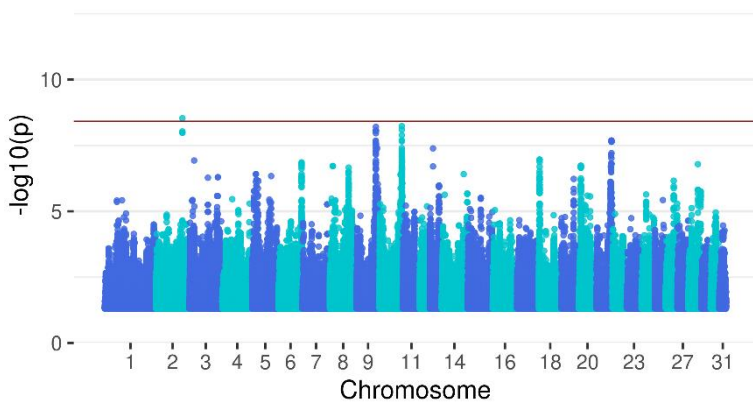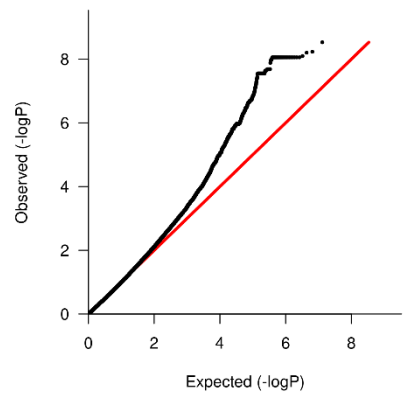

$\lambda = 0.950$

### Angle (inclination) of croup [flat (level) - sloping]

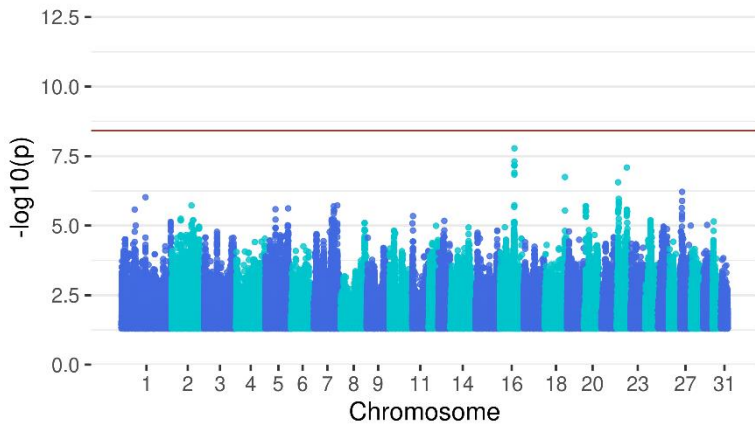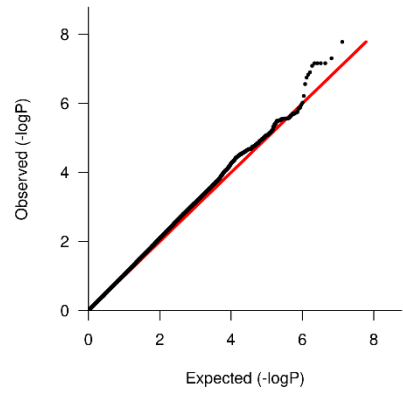

$\lambda = 1.033$

### Shape of croup [angular - round]

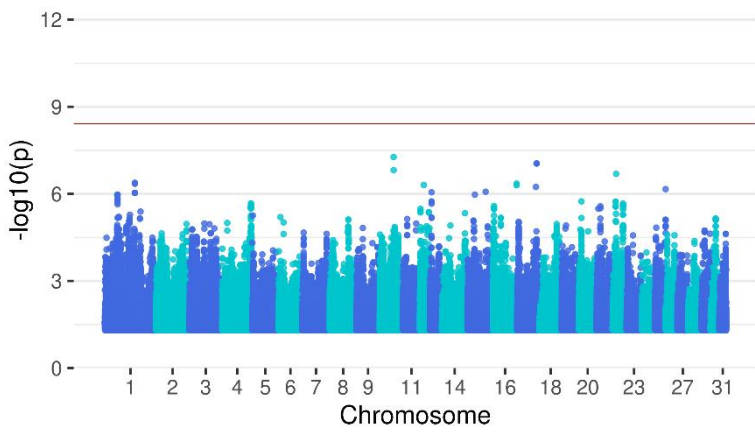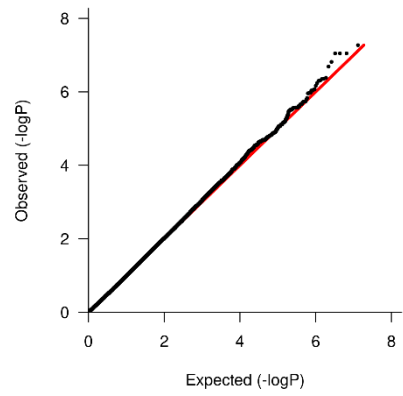

$\lambda = 0.948$

### Set of tail [low - high]

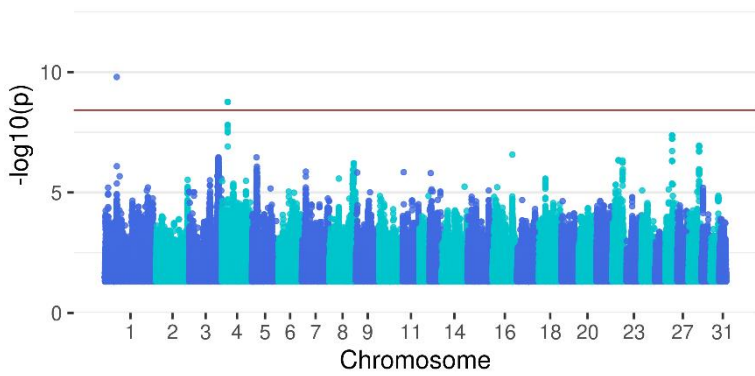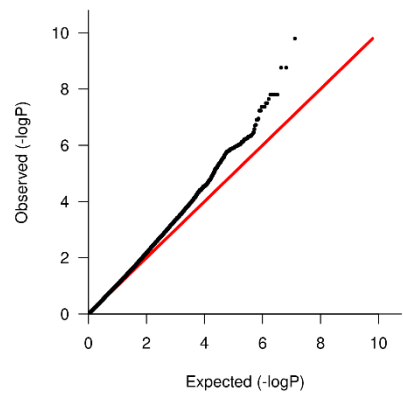

$\lambda = 1.060$

### Position of carpus [over at knee - back at knee]

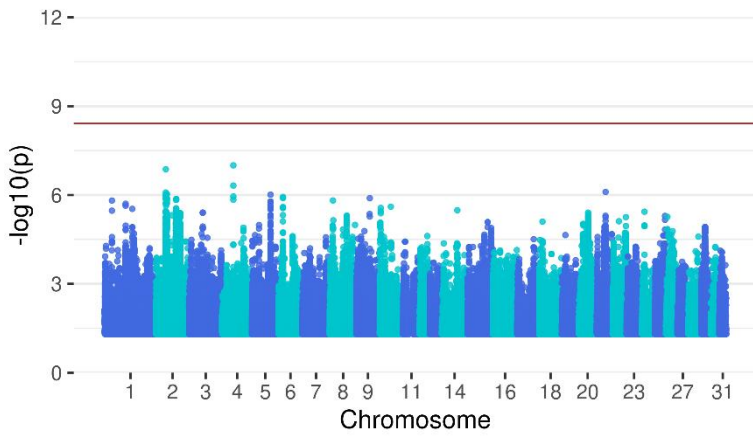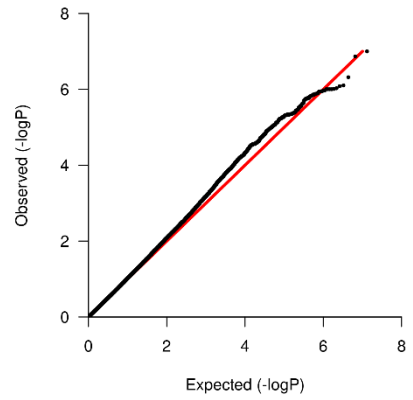

$\lambda = 1.008$

### Length of forelimb pastern [short - long]

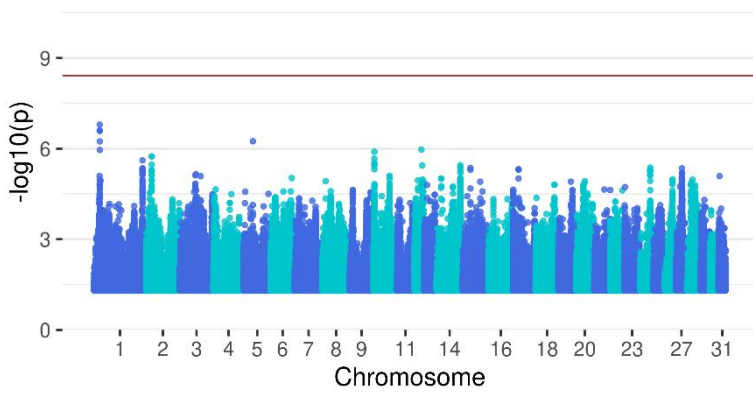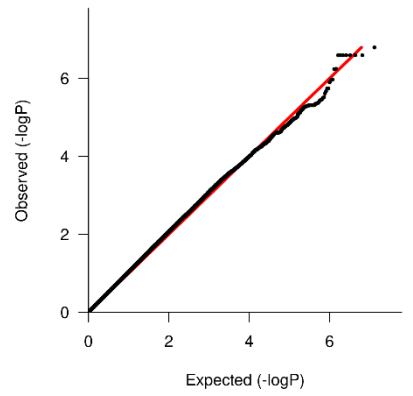

$\lambda = 1.038$

### Stance of forelimb pastern [upright - sloping (weak)]

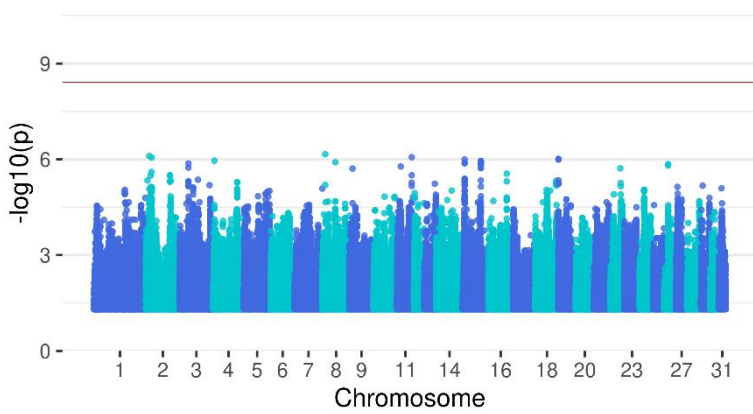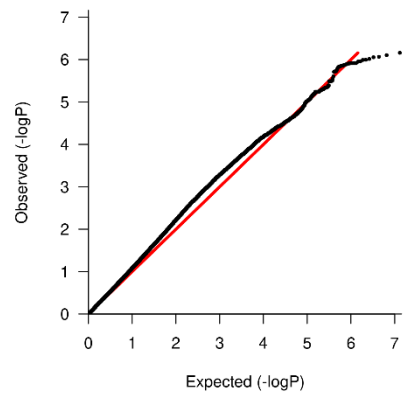

$\lambda = 1.102$

### Broken toe axis in front limbs [markedly broken toe axis]

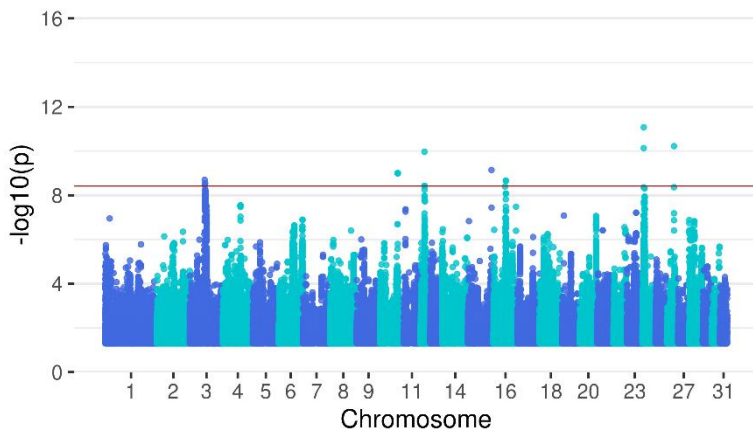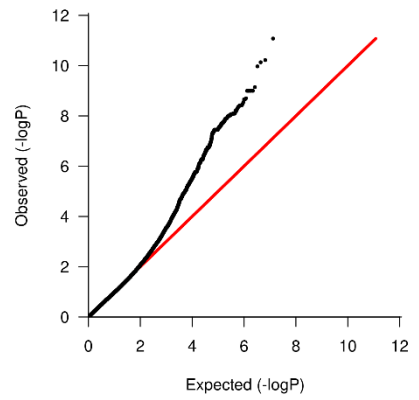

$\lambda = 1.004$

### Definition of foreleg joints [flat (weak) - distinct]

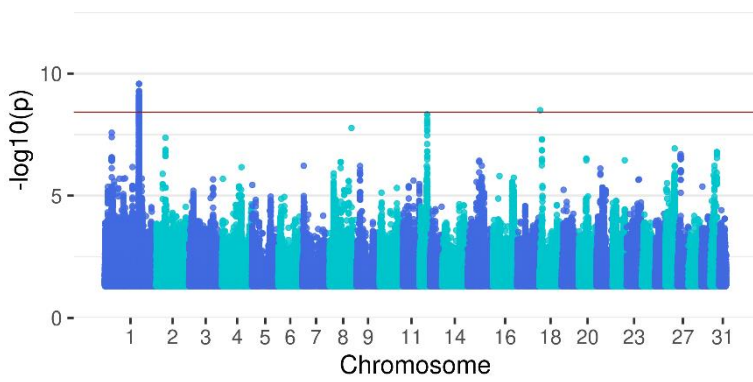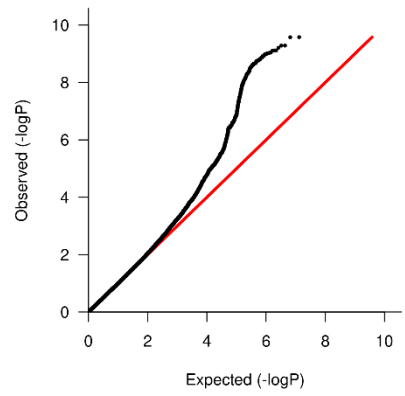

$\lambda = 0.988$

### Definition of carpus-cannon articulation [flat - tied-in]

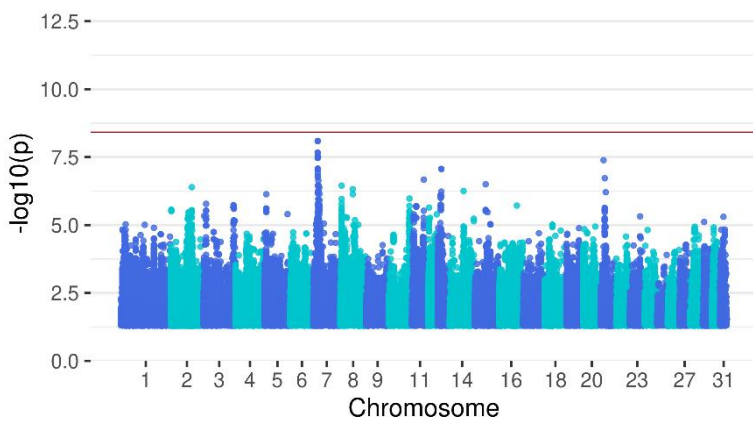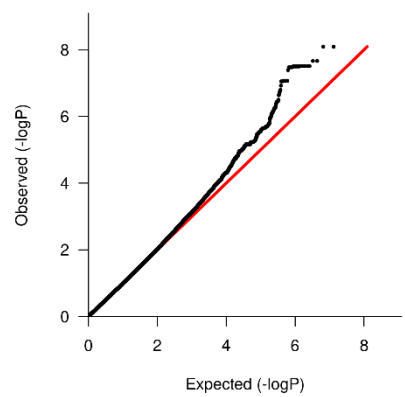

$\lambda = 0.990$

### Length of hind limb pastern [short - long]

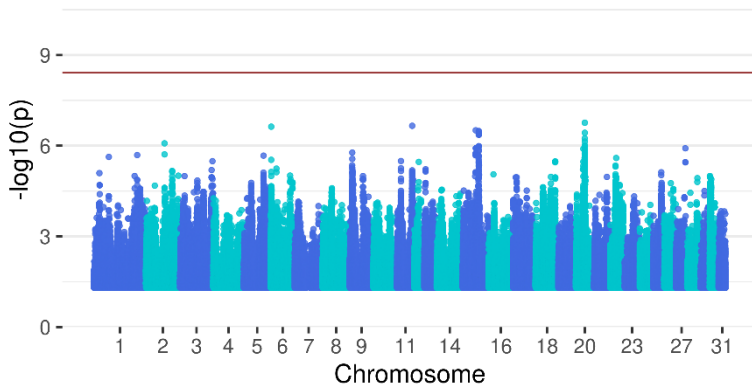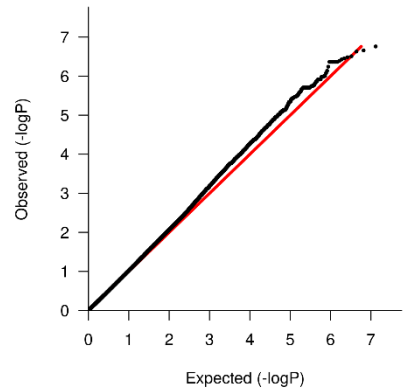

$$\lambda = 1.024$$

### Stance of hind limb pastern [upright - weak]

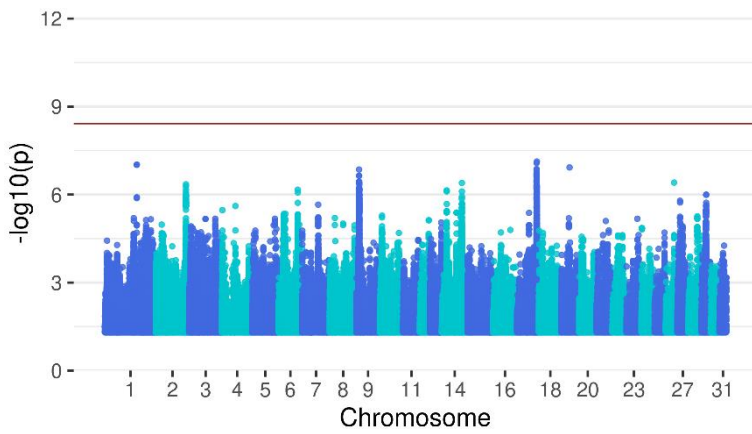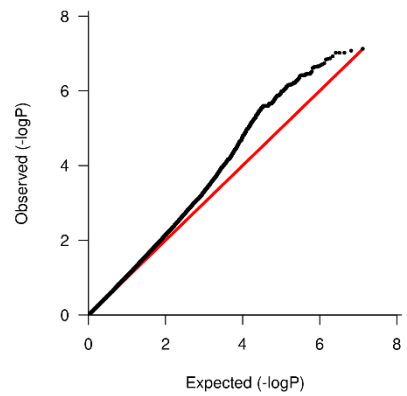

$$\lambda = 1.050$$

### Hock angulation [straight - angulated]

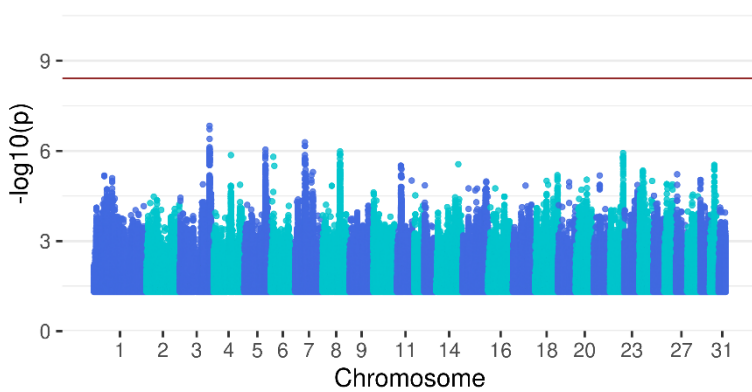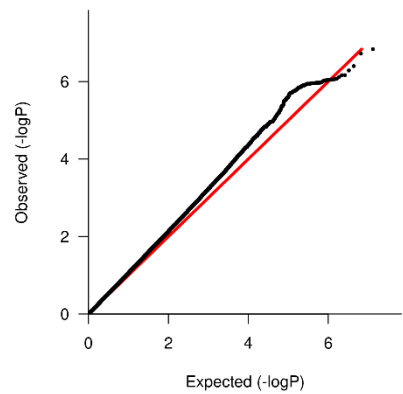

$$\lambda = 1.076$$

### Hind leg [round]

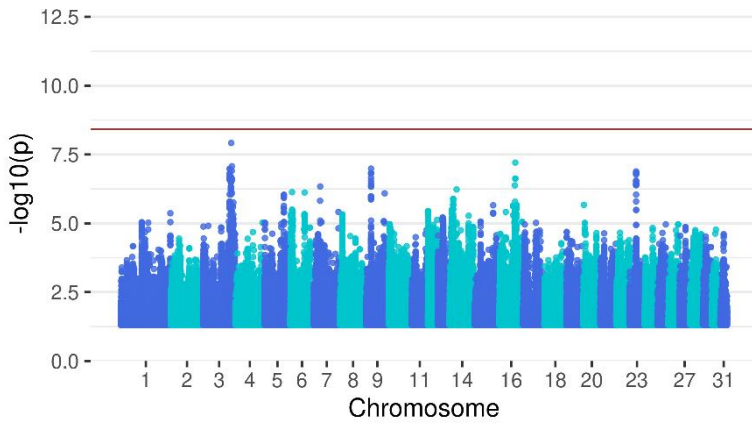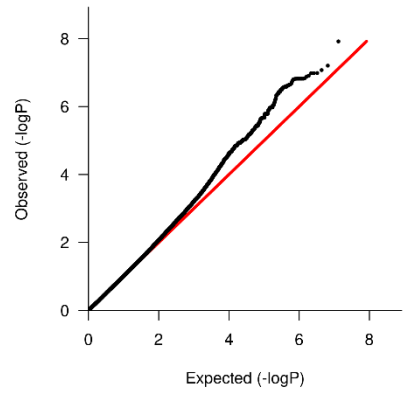

$\lambda = 1.014$

### Capped hock [markedly capped hock]

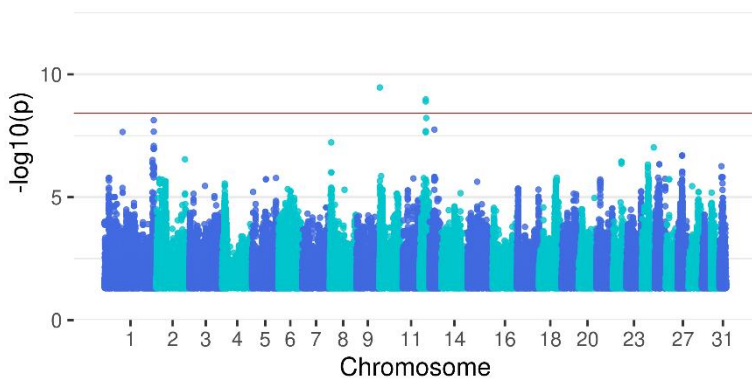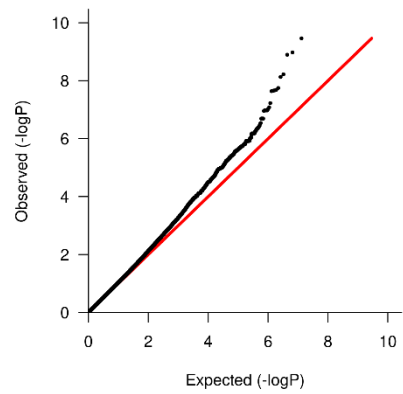

$\lambda = 1.050$

### Definition of tarsus-cannon articulation [flat - tied-in]

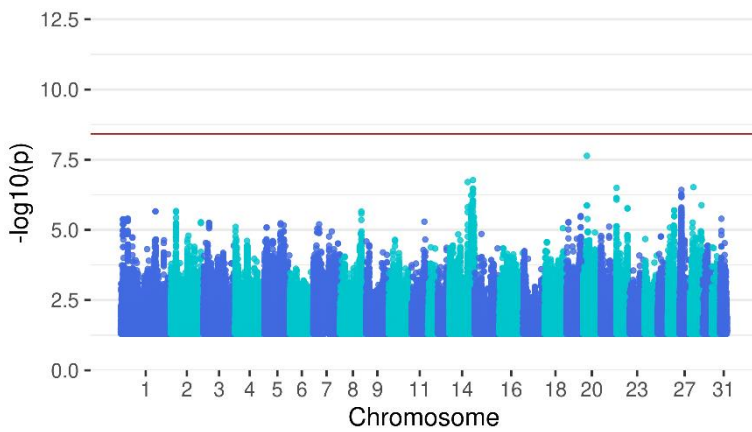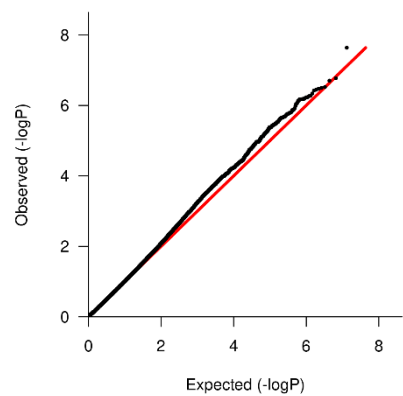

$\lambda = 0.985$



### Size of joints [small - big]

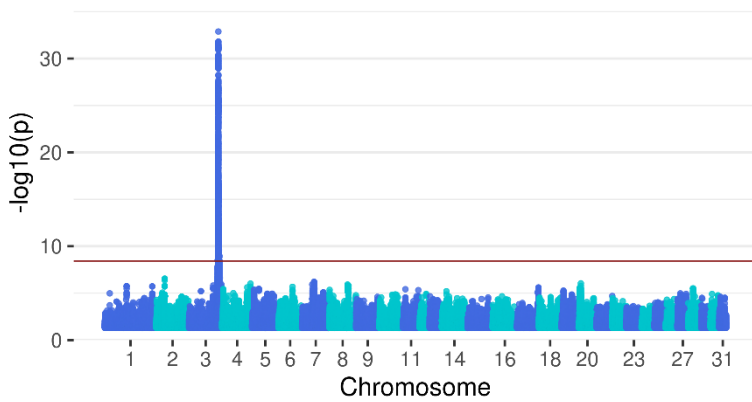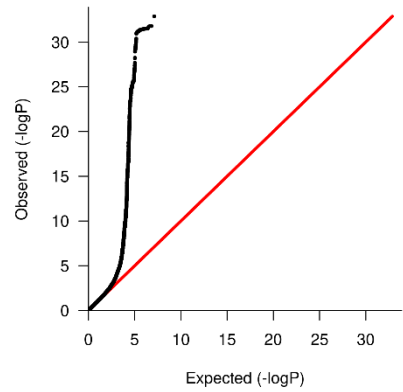

$$\lambda = 1.024$$

### Shape of feet (hoof size) [narrow, small - wide, big]

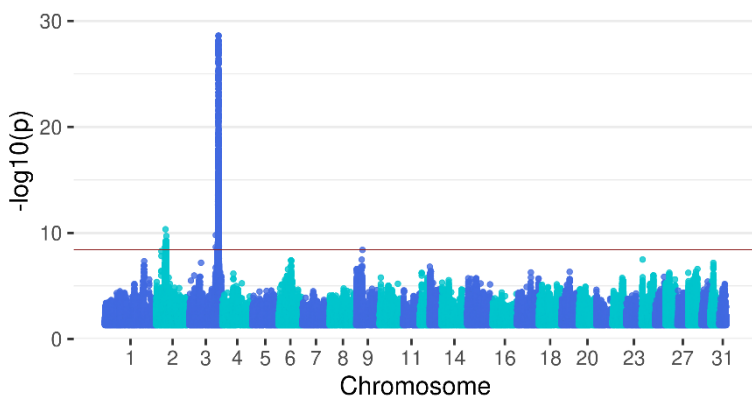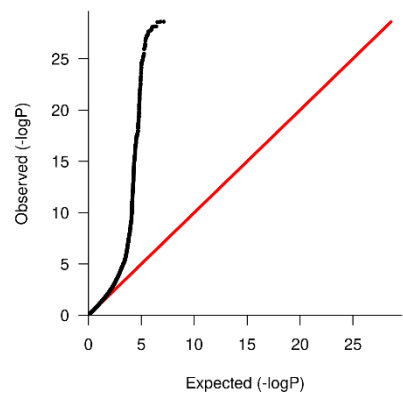

$$\lambda = 1.066$$

### Heel height [flat hoof (-3), low heels - high heels, club foot (+3)]

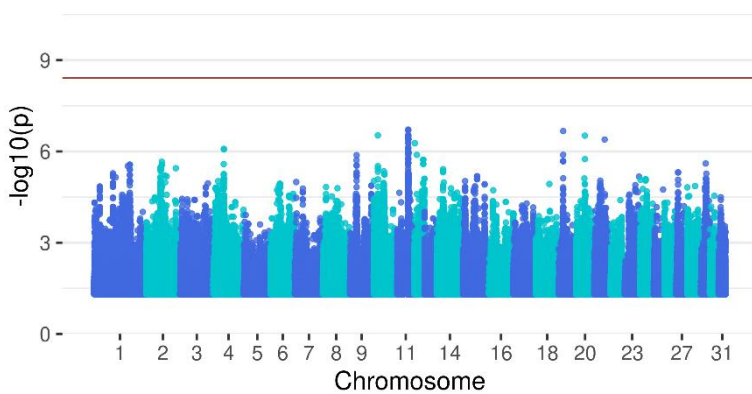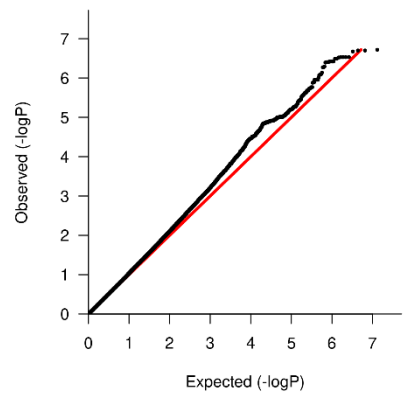

$$\lambda = 1.045$$

### Hoof asymmetry (uneven shape of feet) [markedly uneven feet]

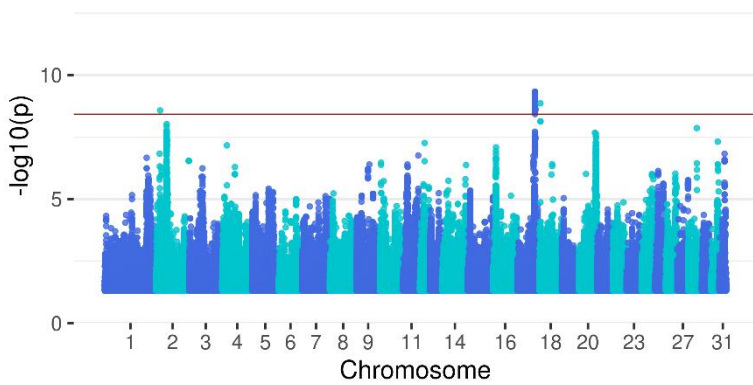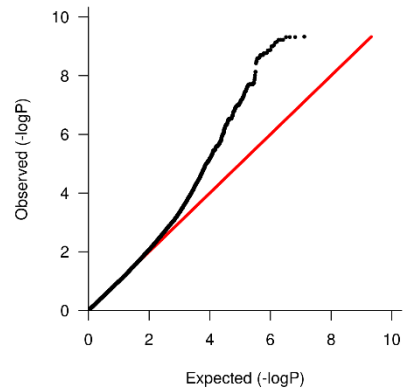

$\lambda = 0.990$

### Toe stance of forelegs [toe-in - toe-out]

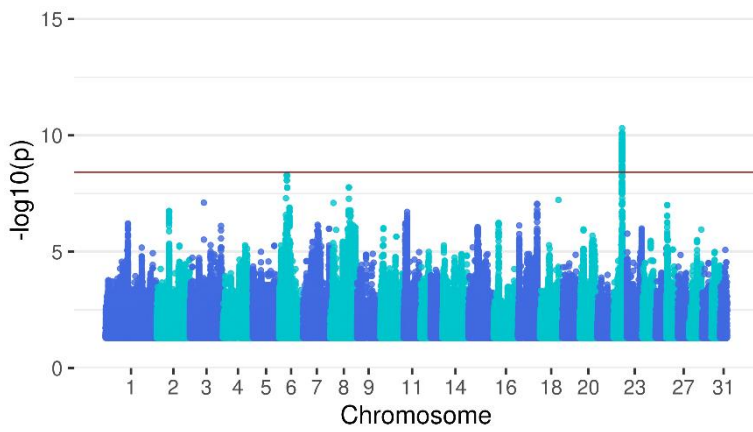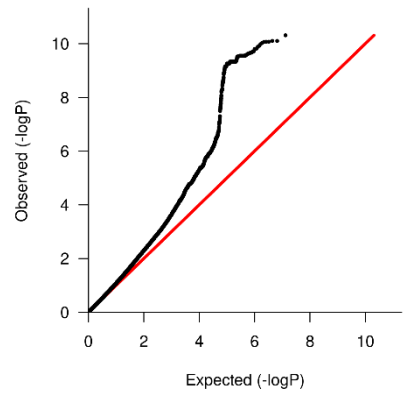

$\lambda = 1.087$

### Standing position of front limbs [base-narrow - base-wide]

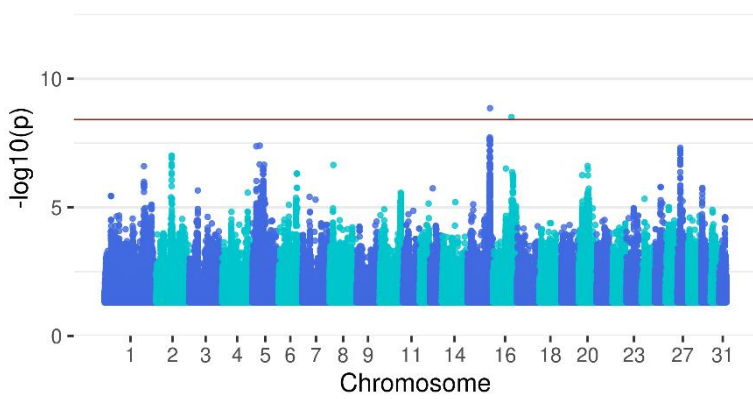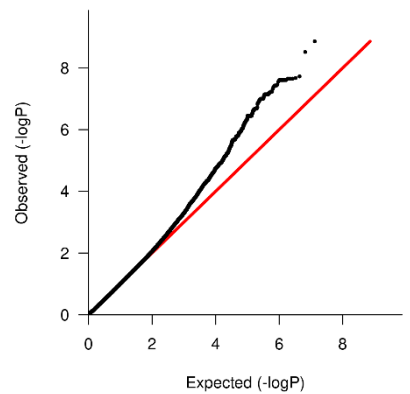

$\lambda = 0.981$

### Toe stance of hind legs [toe-in - toe-out]

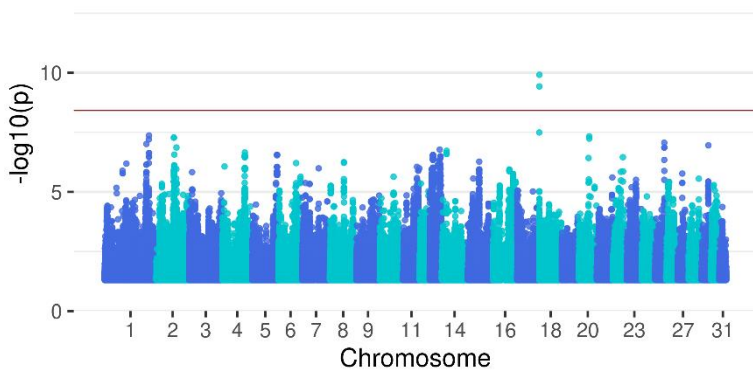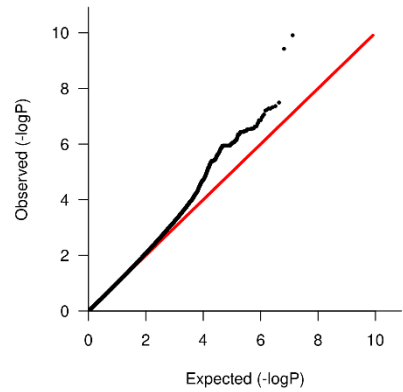

$\lambda = 0.976$

### Standing position of hind limbs [base-narrow - base-wide]

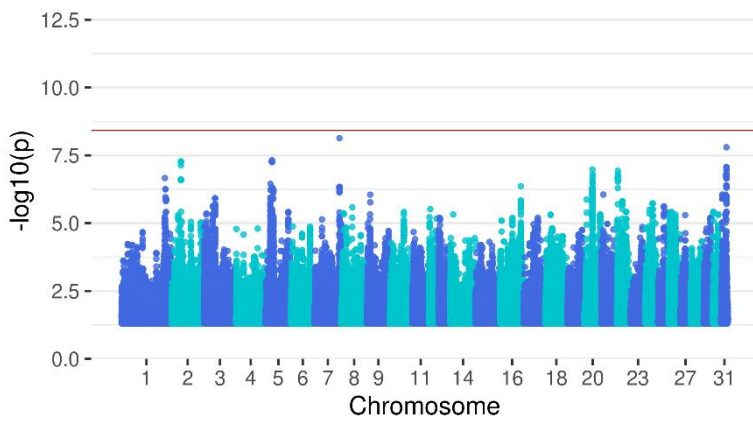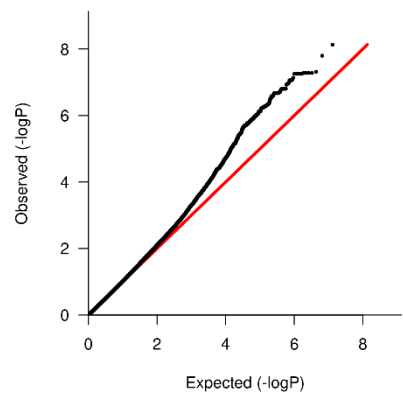

$\lambda = 0.986$

### Position of hock - back view [bow-hocked - cow-hocked]

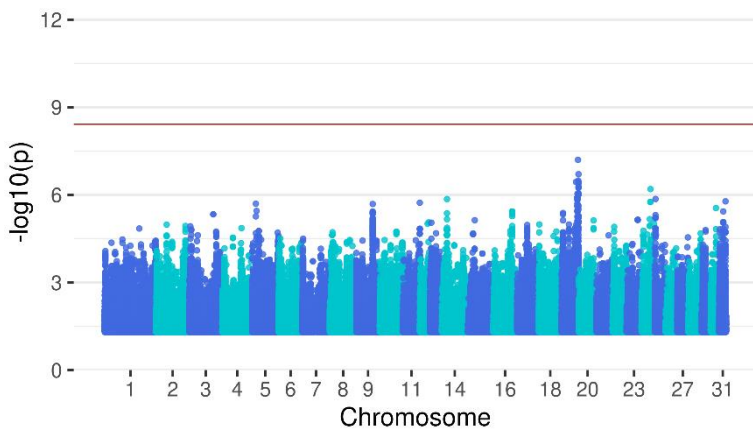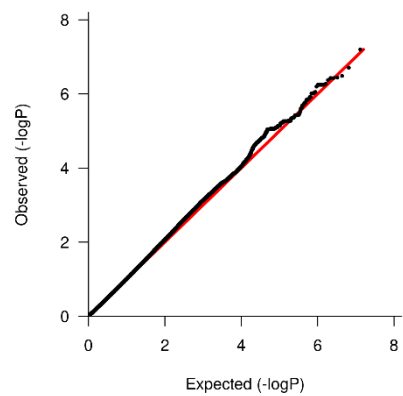

$\lambda = 0.979$

**Correctness of limb movement [plaiting (brushing) - dishing (winging)]**

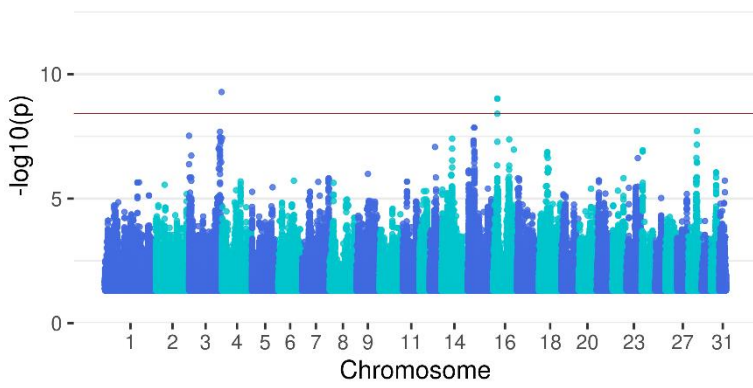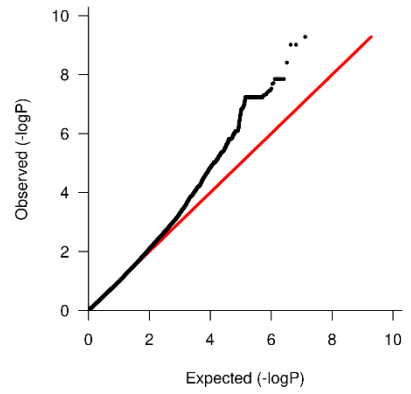

$\lambda = 0.958$

**Rotation in the hock [marked rotation]**

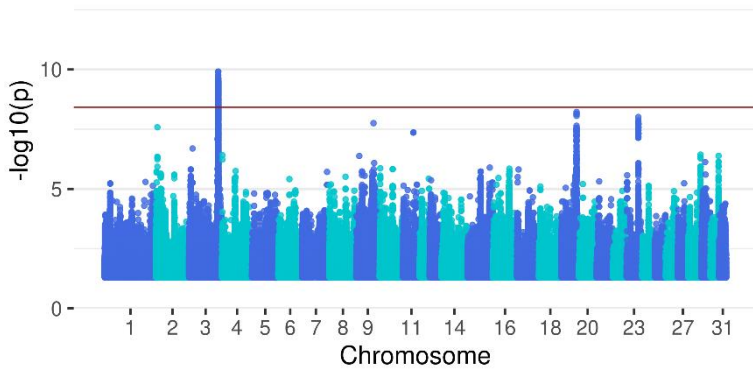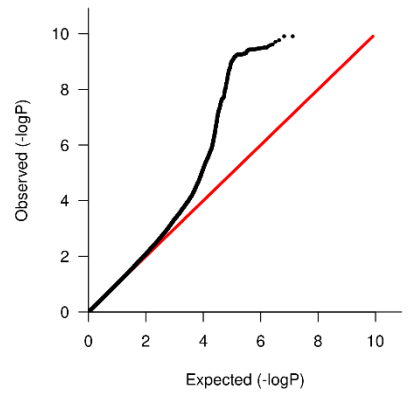

$\lambda = 1.017$

**Tail position [markedly off-center]**

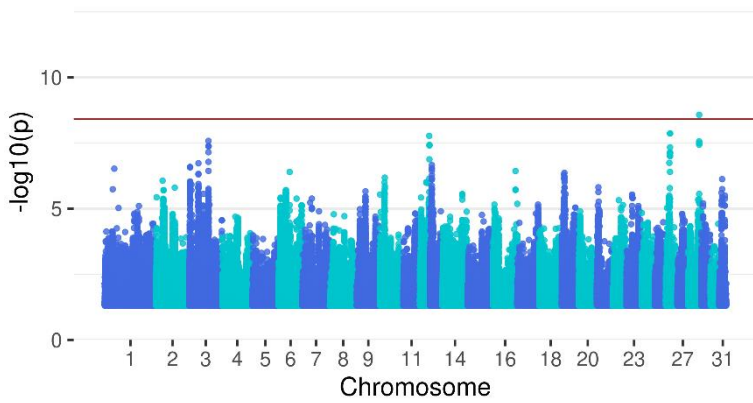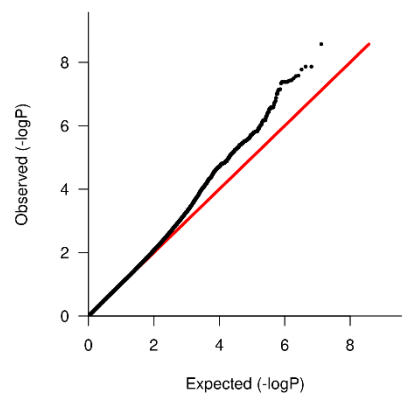

$\lambda = 1.046$

**Tail tone [un-toned - over-toned]**

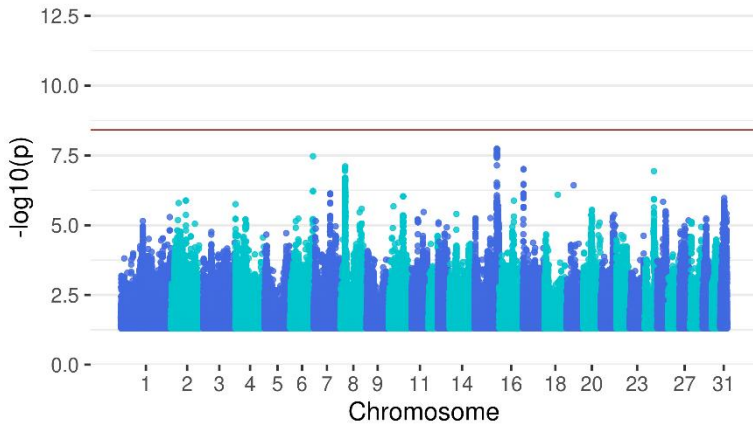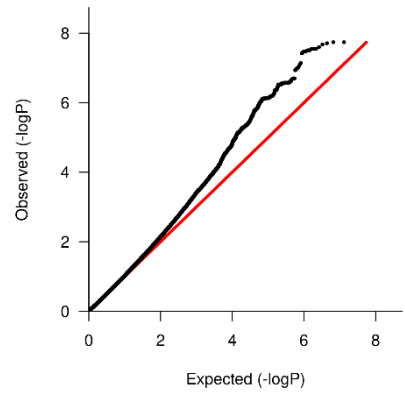

$\lambda = 1.008$
