# Supplementary material for: Genomic analyses of withers height and linear conformation traits in German Warmblood horses using imputed sequence-level genotypes
Source: Springer Nature journal article supplement (doi:10.1186/s12711-024-00914-6), 2024-06-13
Supplement: MOESM8 [file 12711_2024_914_MOESM8_ESM.pdf]

**Breed type [plain - true to type]**

**Fixed effect: withers height**

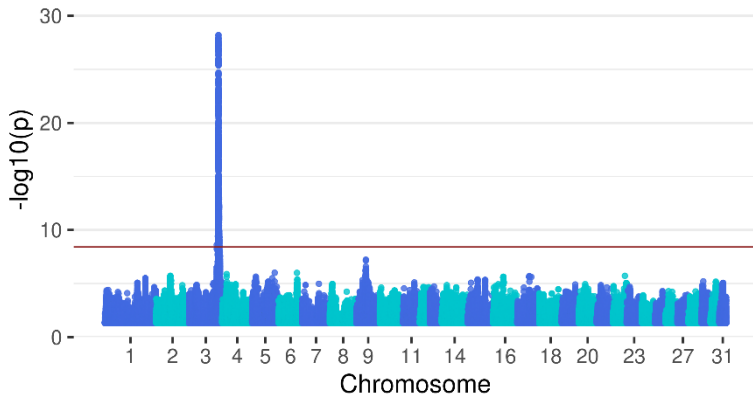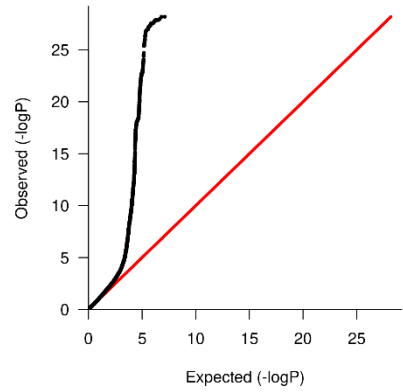

$\lambda = 1.085$

**Fixed effect: top SNP from GWAS withers height (rs68603062) = own top SNP from GWAS**

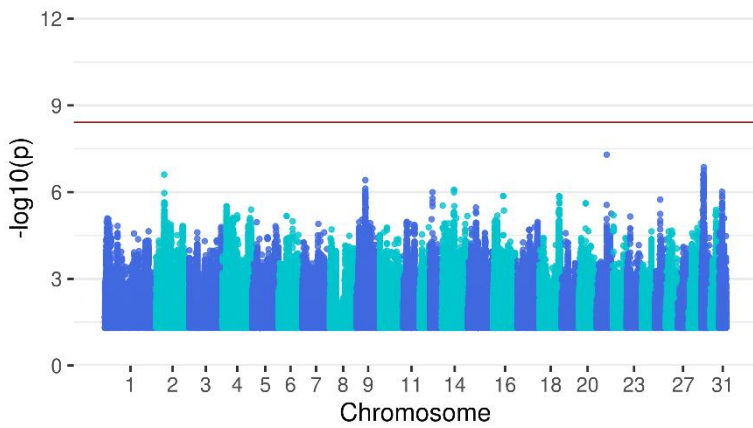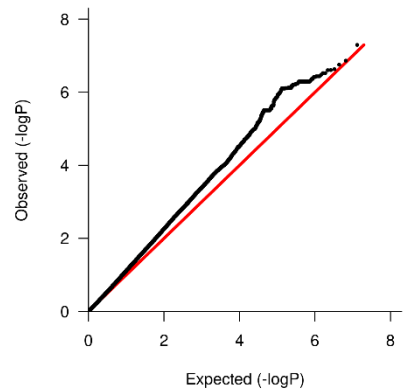

$\lambda = 1.127$

**Gender expression [weak - strong]**

**Fixed effect: withers height**

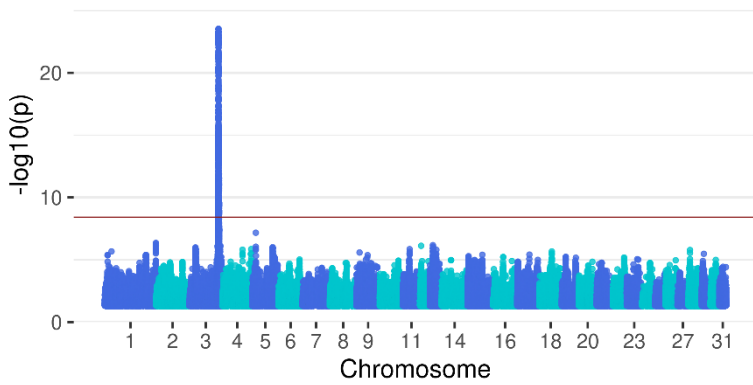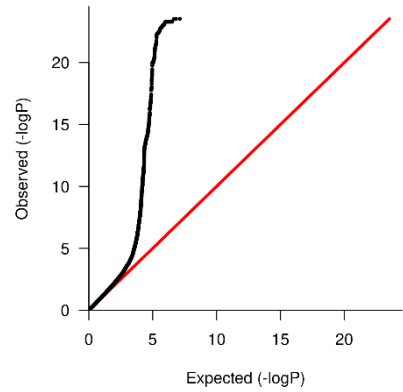

$\lambda = 1.077$

**Fixed effect: top SNP from GWAS withers height (rs68603062)**

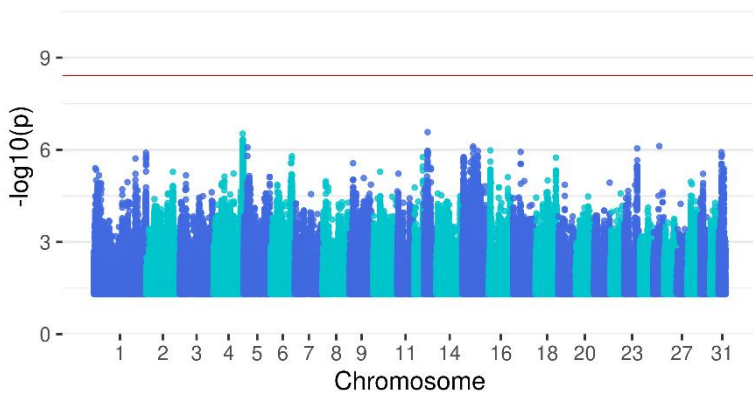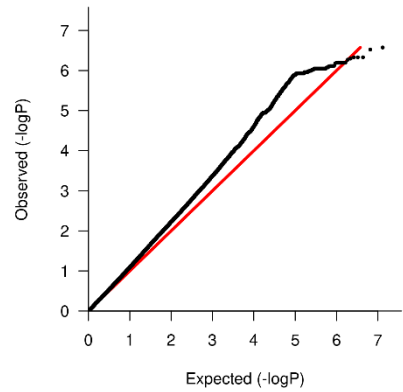

$\lambda = 1.111$

**Fixed effect: own top SNP from GWAS (rs1139838416)**

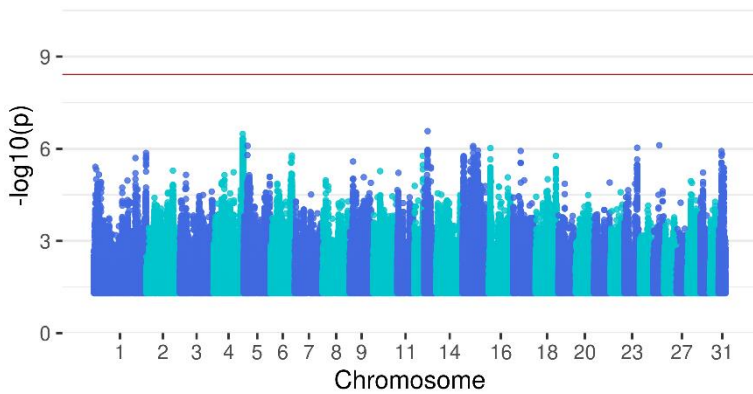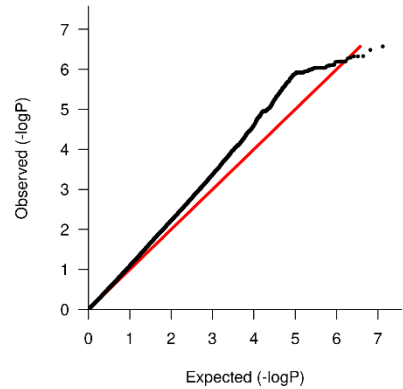

$\lambda = 1.111$

Frame [small-framed - large-framed]

**Fixed effect: withers height**

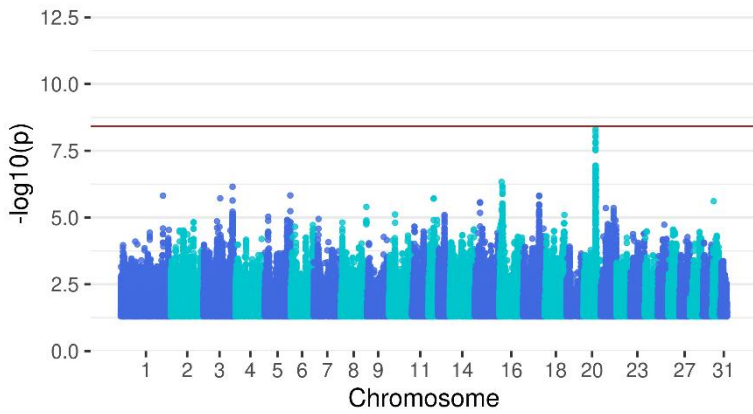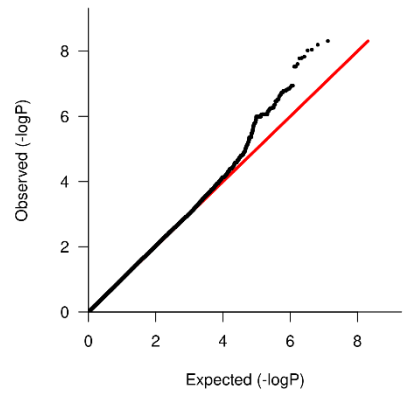

$\lambda = 1.010$

**Fixed effect: top SNP from GWAS withers height (rs68603062)**

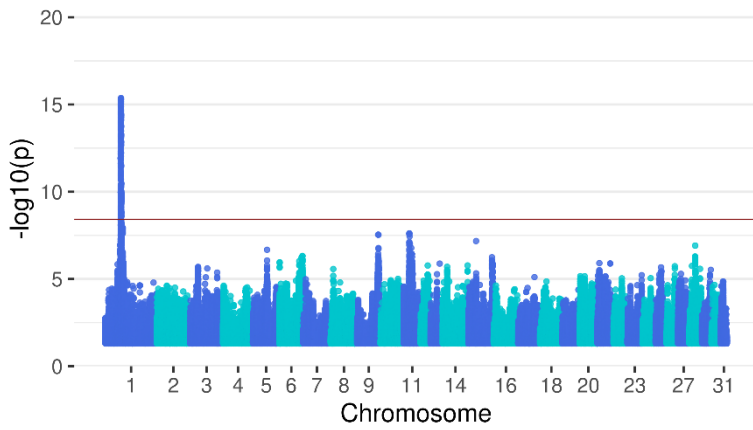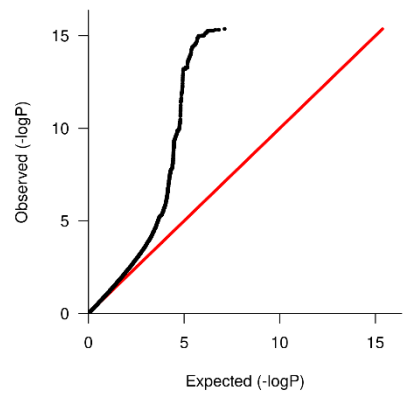

$\lambda = 1.121$

**Fixed effect: own top SNP from GWAS (rs1145719639)**

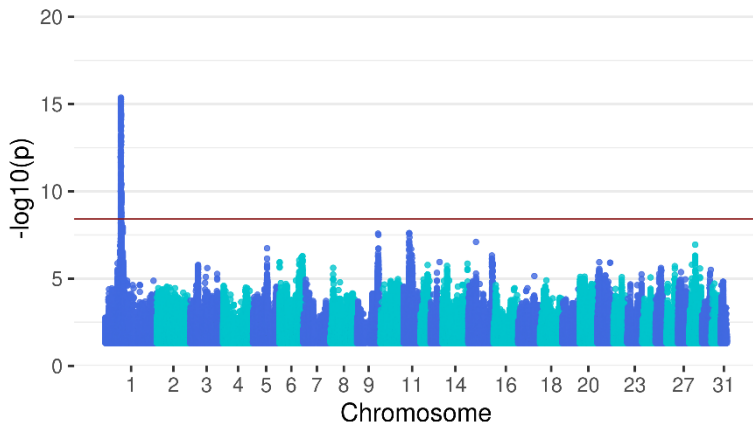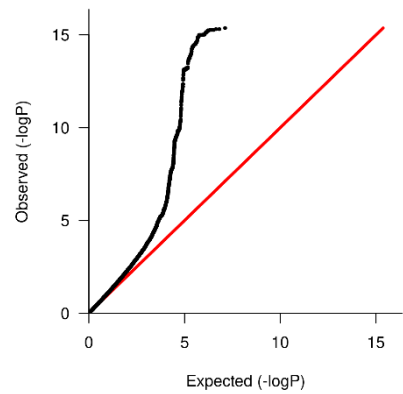

$\lambda = 1.122$

**Caliber [light - heavy]**

**Fixed effect: withers height**

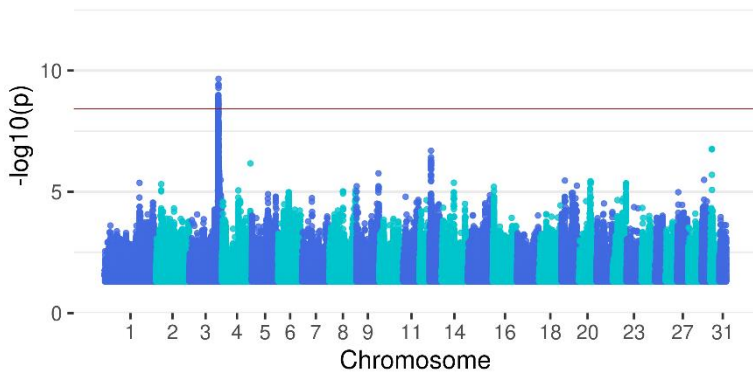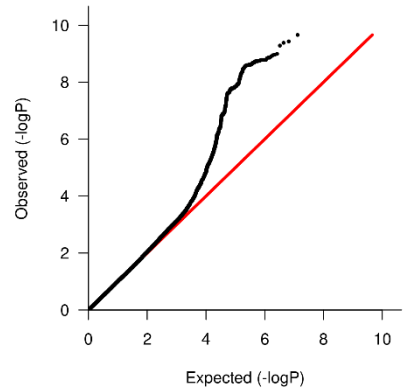

$\lambda = 0.998$

**Fixed effect: top SNP from GWAS withers height (rs68603062)**

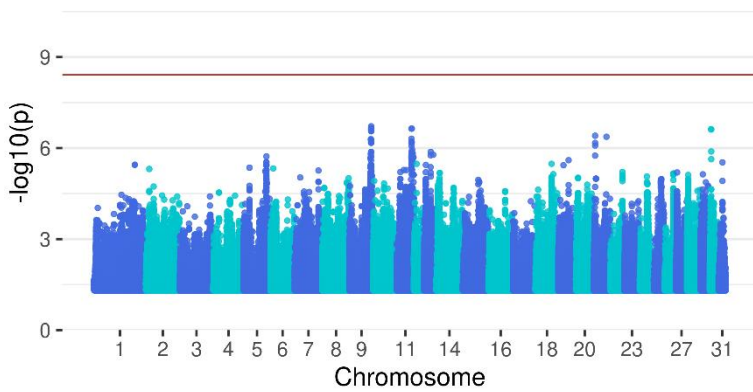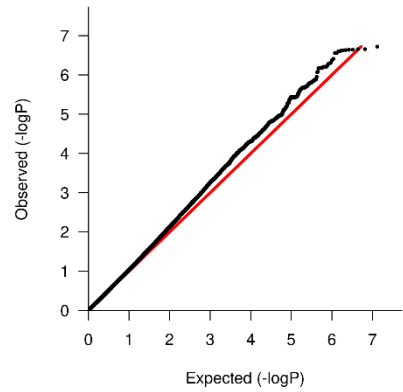

$\lambda = 1.029$

**Fixed effect: own top SNP from GWAS (rs1141597173)**

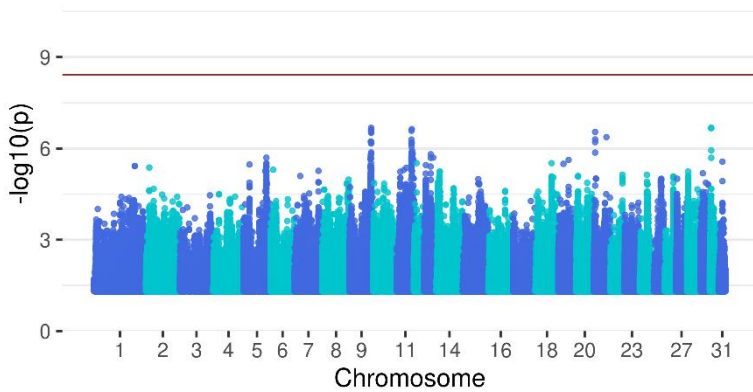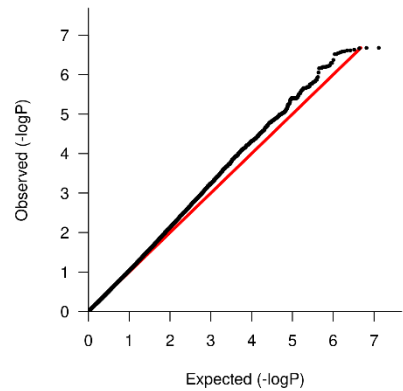

$\lambda = 1.029$

**Length of legs [short-legged - long-legged]**

**Fixed effect: withers height**

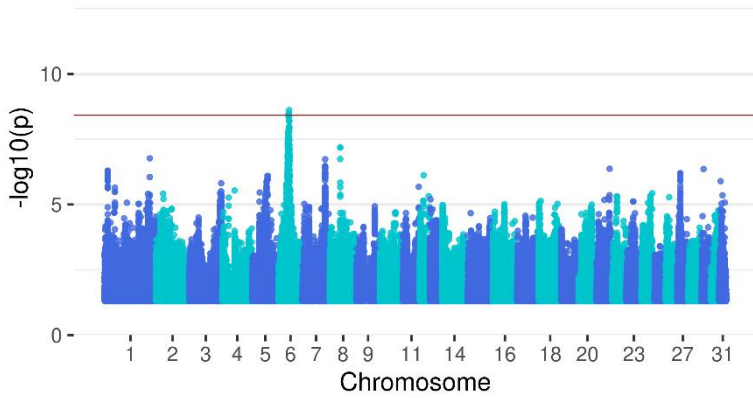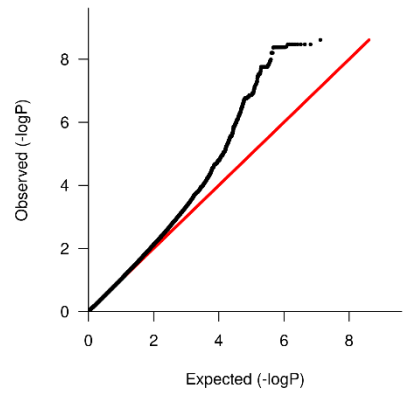

$\lambda = 1.006$

**Fixed effect: top SNP from GWAS withers height (rs68603062)**

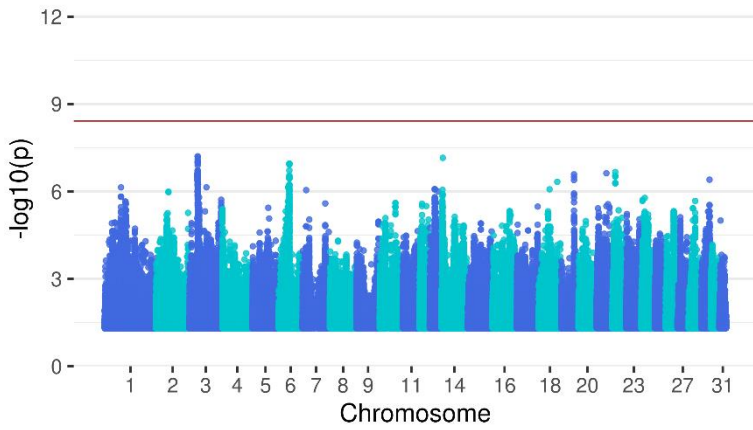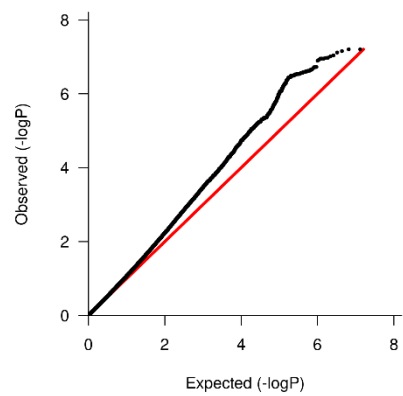

$\lambda = 1.071$

**Fixed effect: own top SNP from GWAS (rs1139838416)**

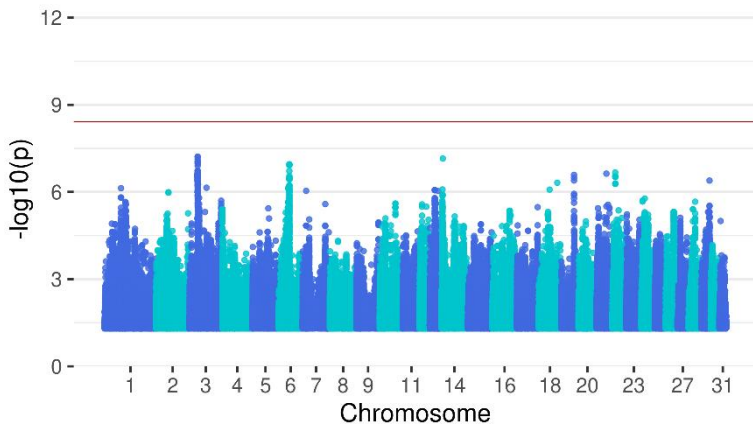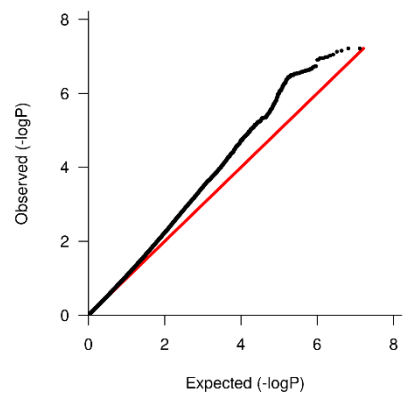

$\lambda = 1.071$

**Body shape [square - (long-)rectangular]**

**Fixed effect: withers height**

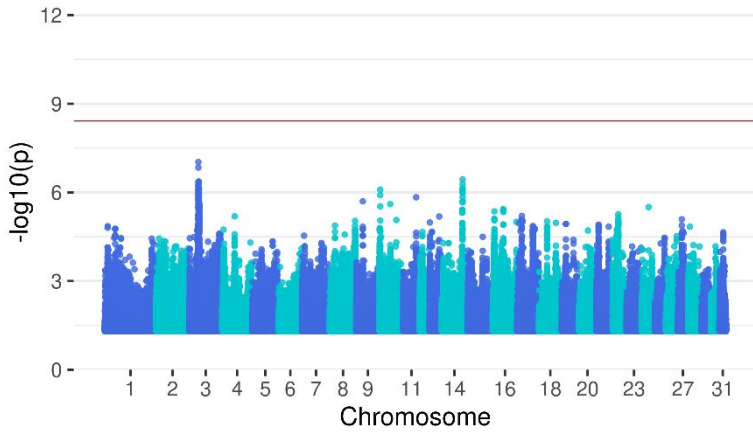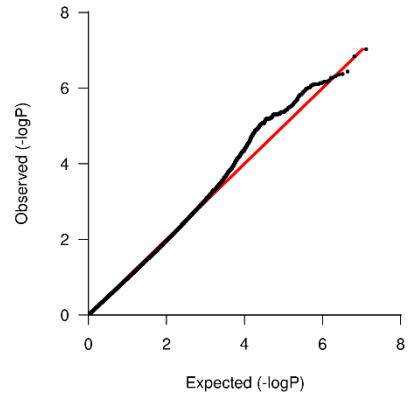

$\lambda = 0.953$

**Fixed effect: top SNP from GWAS withers height (rs68603062)**

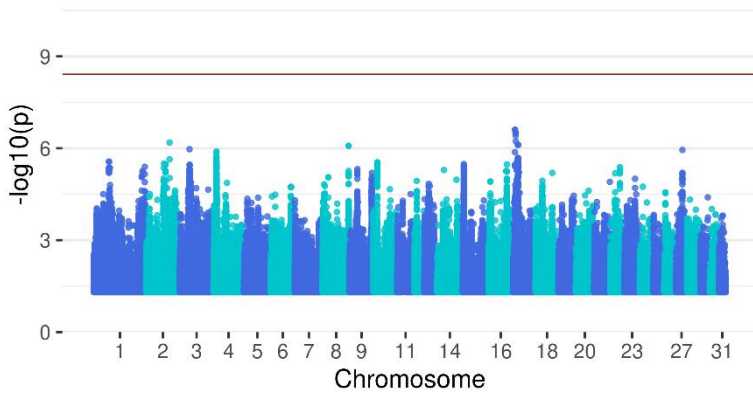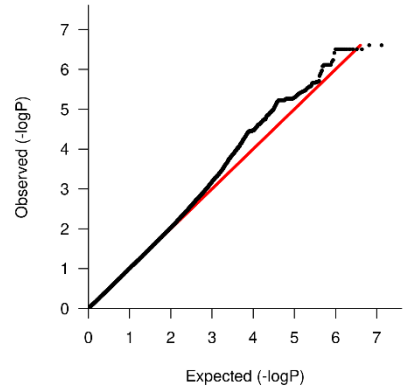

$\lambda = 0.998$

**Fixed effect: own top SNP from GWAS (rs1138898791)**

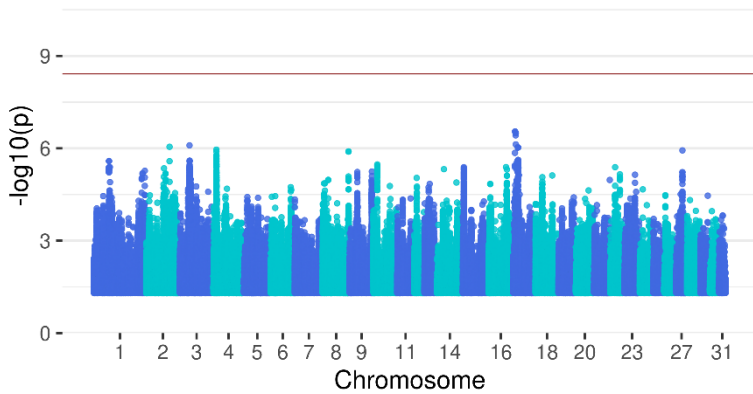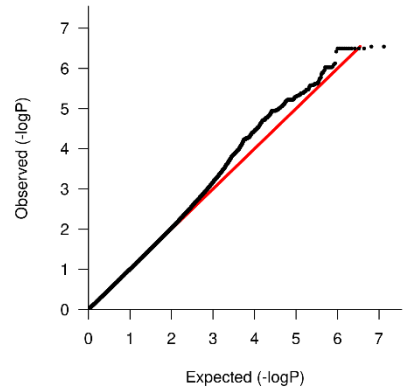

$\lambda = 0.992$

**Head shape [coarse - fine]**

**Fixed effect: withers height**

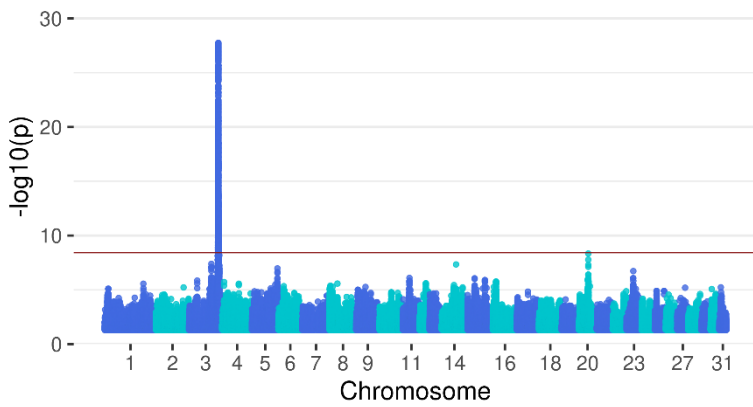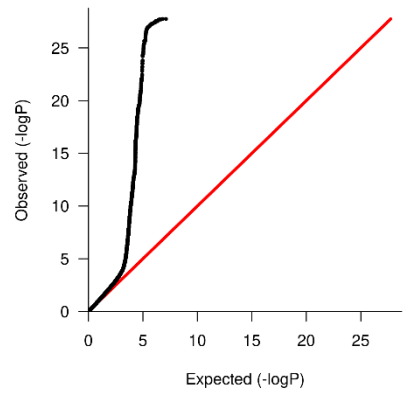

$\lambda = 1.119$

**Fixed effect: top SNP from GWAS withers height (rs68603062) = own top SNP from GWAS**

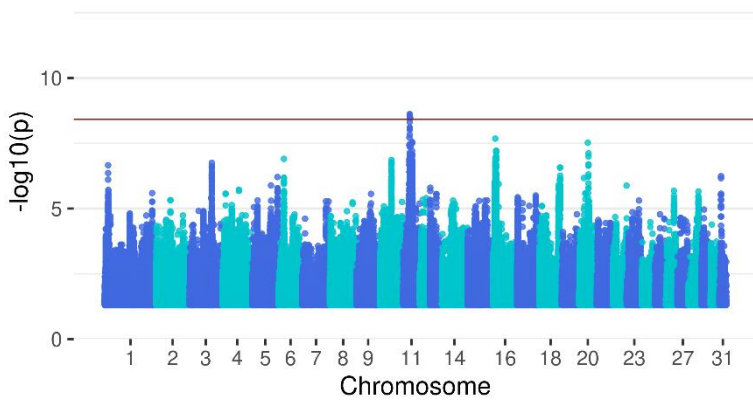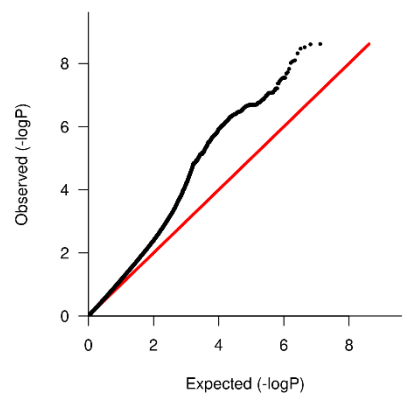

$\lambda = 1.187$

**Head length [short - long]**

**Fixed effect: withers height**

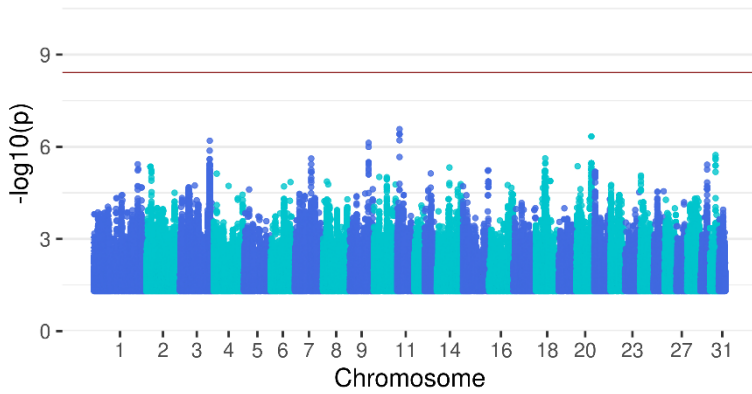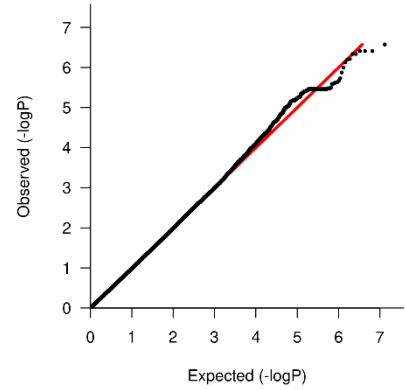

$\lambda = 0.976$

**Fixed effect: top SNP from GWAS withers height (rs68603062)**

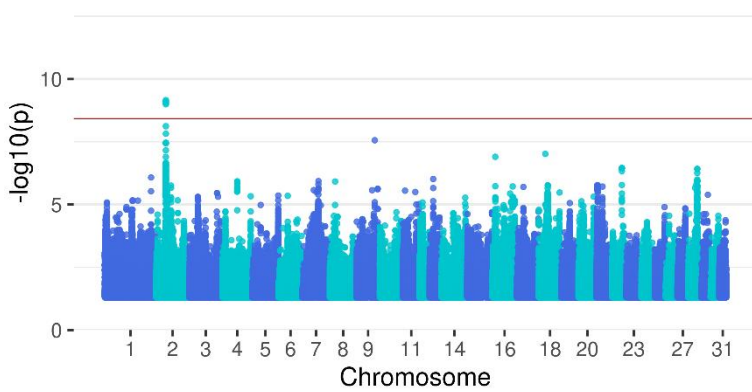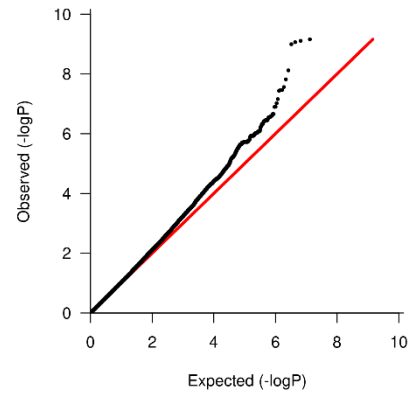

$\lambda = 1.037$

**Fixed effect: own top SNP from GWAS (rs1151617437)**

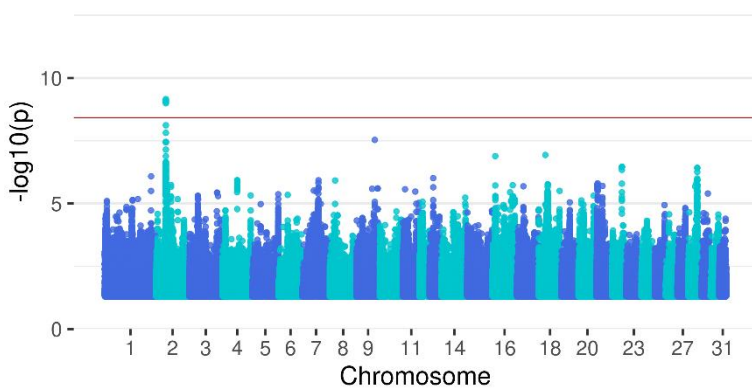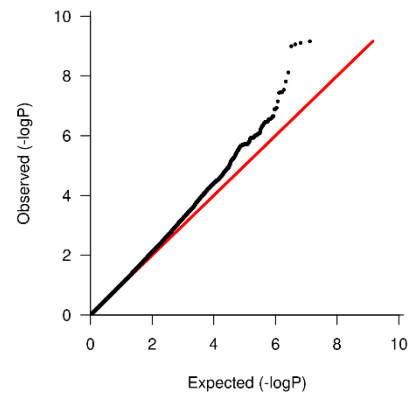

$\lambda = 1.037$



**Eye size [small - large]**

**Fixed effect: withers height**

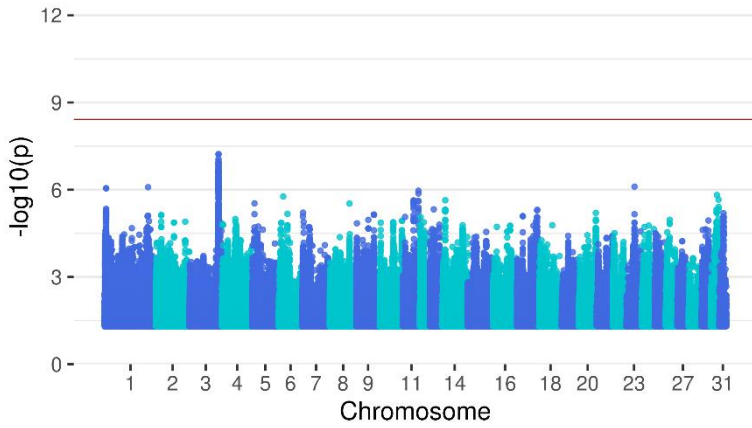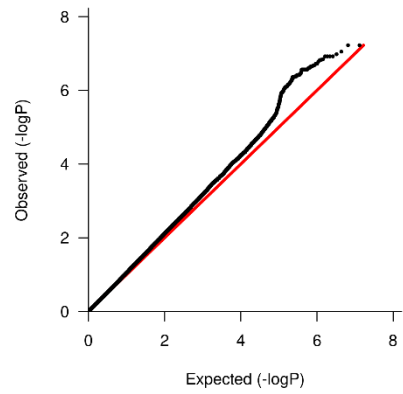

$\lambda = 1.056$

**Fixed effect: top SNP from GWAS withers height (rs68603062)**

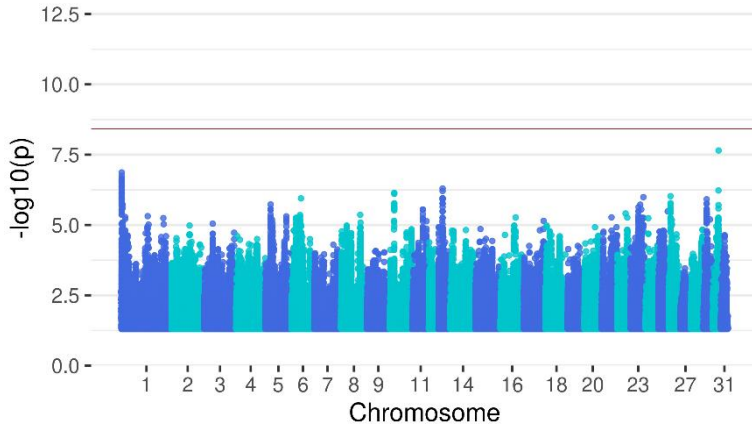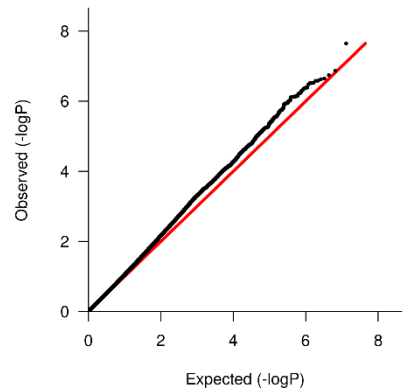

$\lambda = 1.056$

**Fixed effect: own top SNP from GWAS (rs1141505835)**

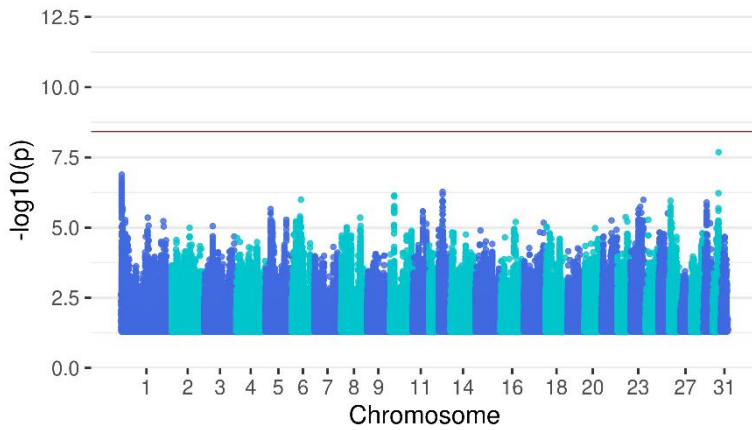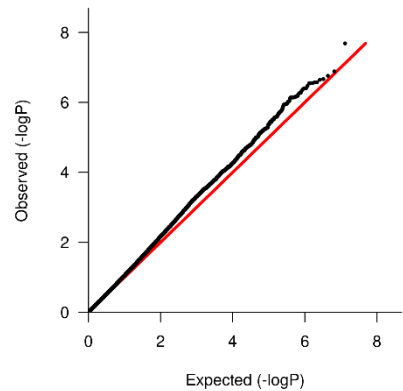

$\lambda = 1.055$

**Length of withers [short - long]**

**Fixed effect: withers height**

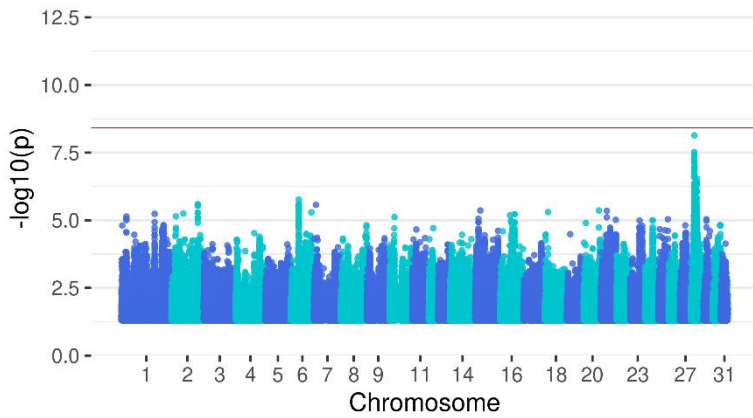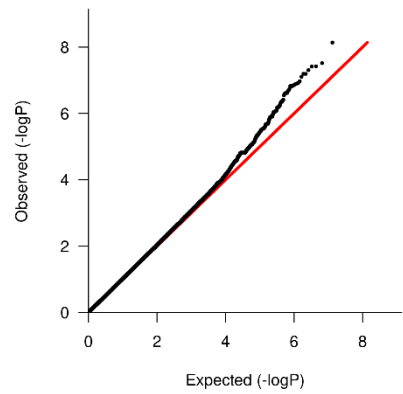

$\lambda = 1.024$

**Fixed effect: top SNP from GWAS withers height (rs68603062)**

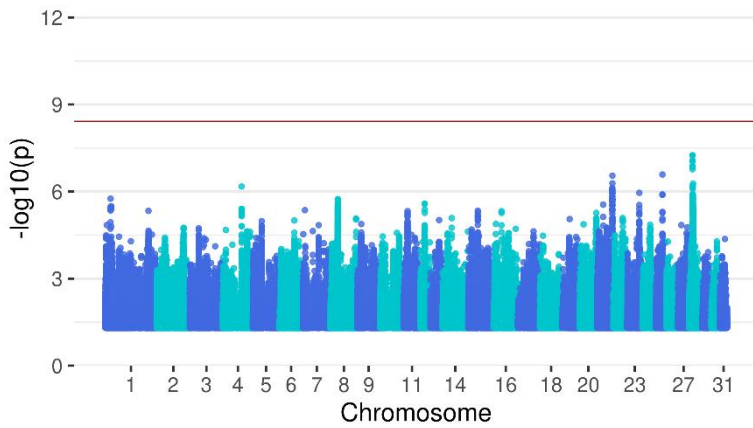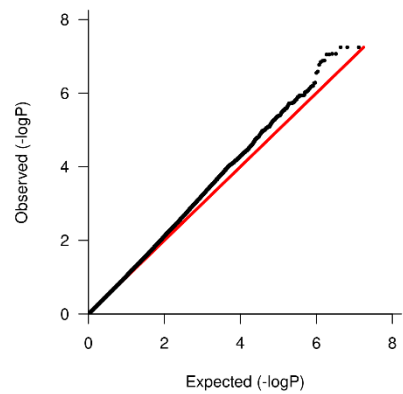

$\lambda = 1.041$

**Fixed effect: own top SNP from GWAS (rs1152276079)**

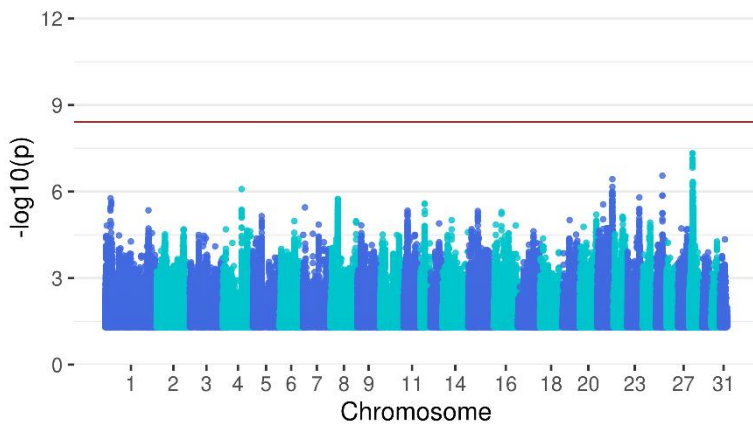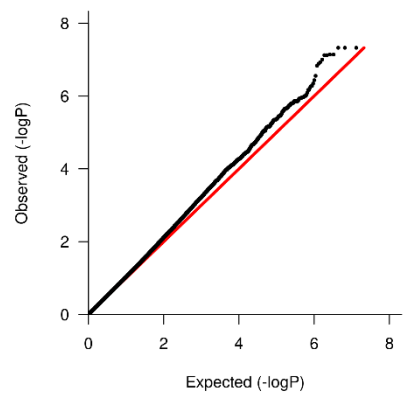

$\lambda = 1.040$

**Size of joints [small - big]**

**Fixed effect: withers height**

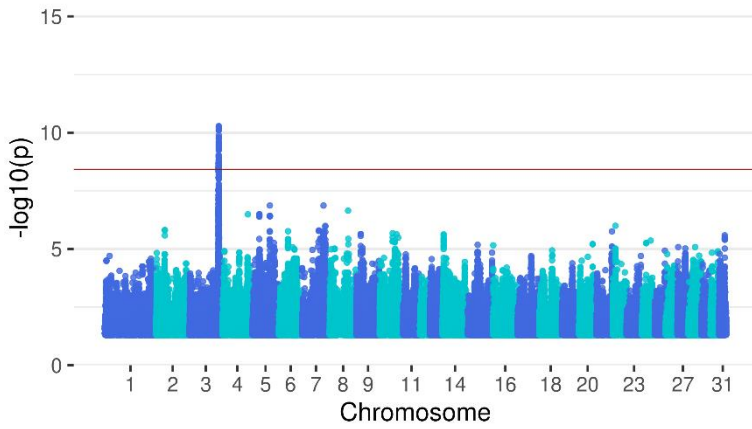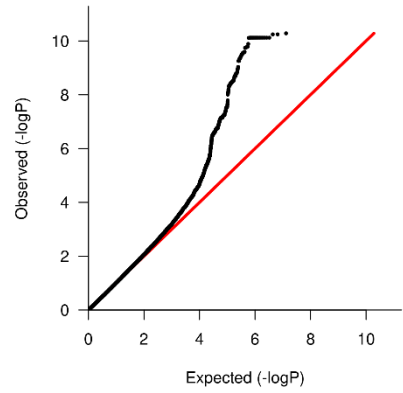

$\lambda = 0.990$

**Fixed effect: top SNP from GWAS withers height (rs68603062)**

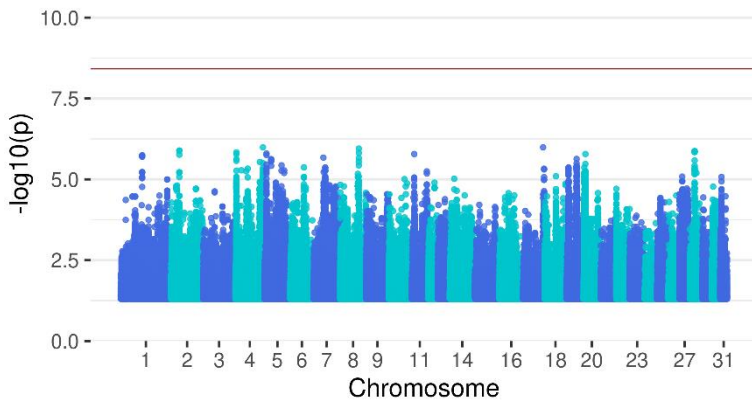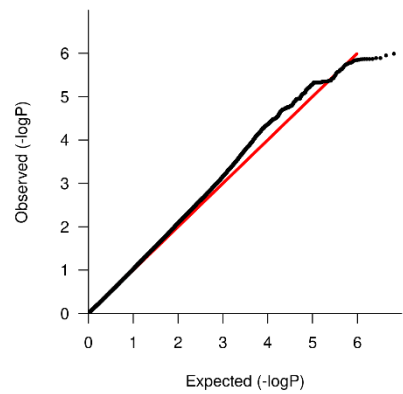

$\lambda = 1.016$

**Fixed effect: own top SNP from GWAS (rs1148343189)**

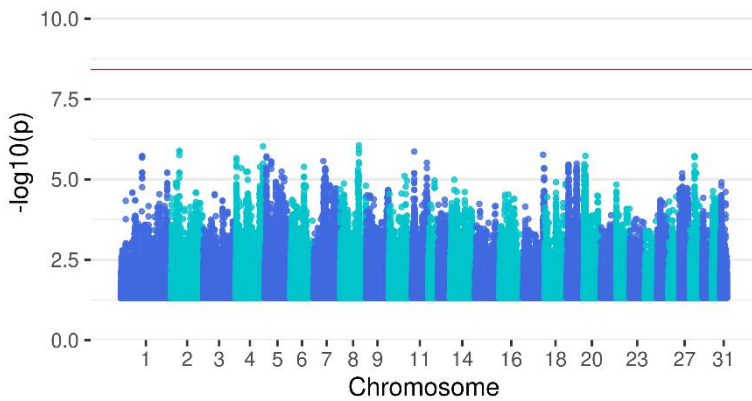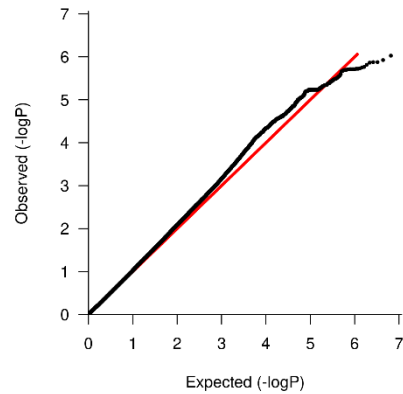

$\lambda = 1.019$

**Shape of feet (hoof size) [narrow, small - wide, big]**

**Fixed effect: withers height**

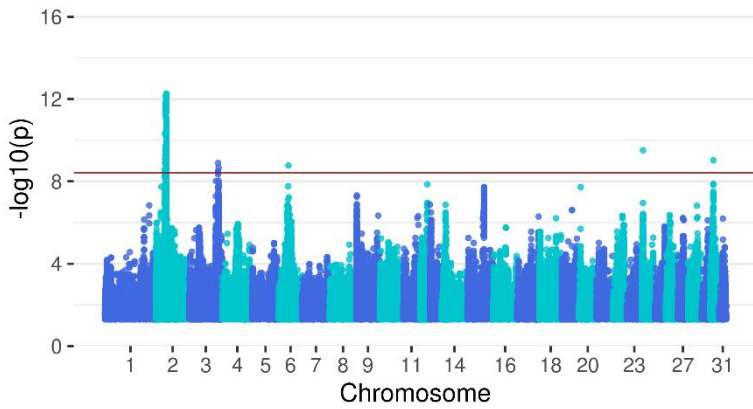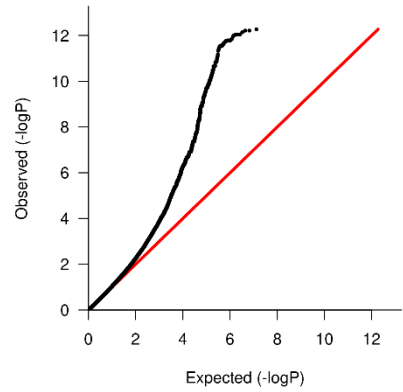

$\lambda = 0.984$

**Fixed effect: top SNP from GWAS withers height (rs68603062)**

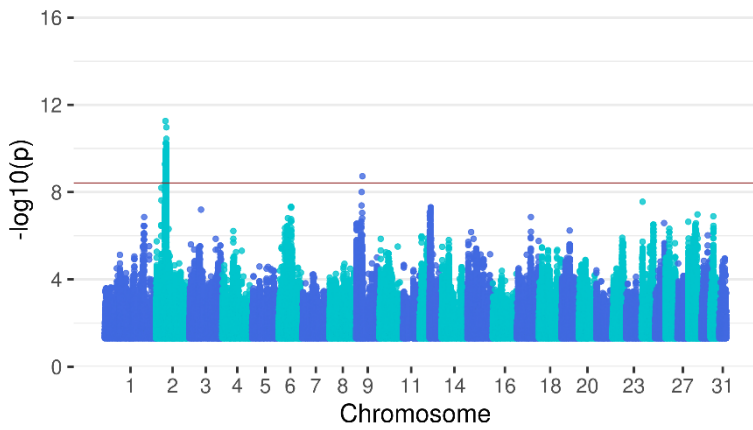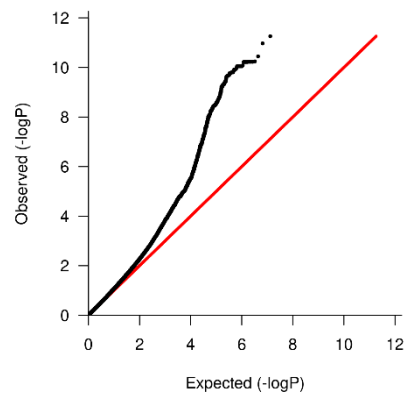

$\lambda = 1.063$

**Fixed effect: own top SNP from GWAS (rs1137427665)**

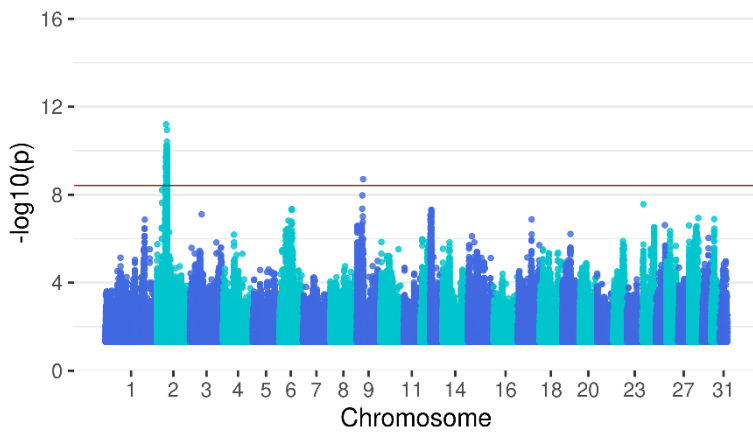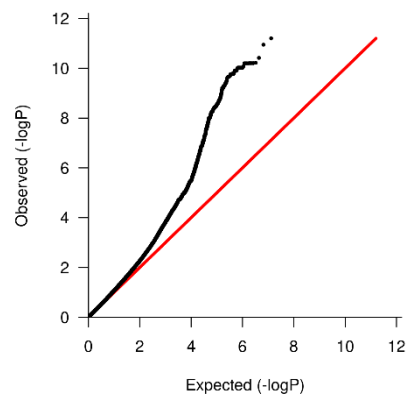

$\lambda = 1.064$

**Rotation in the hock [marked rotation]**

**Fixed effect: withers height**

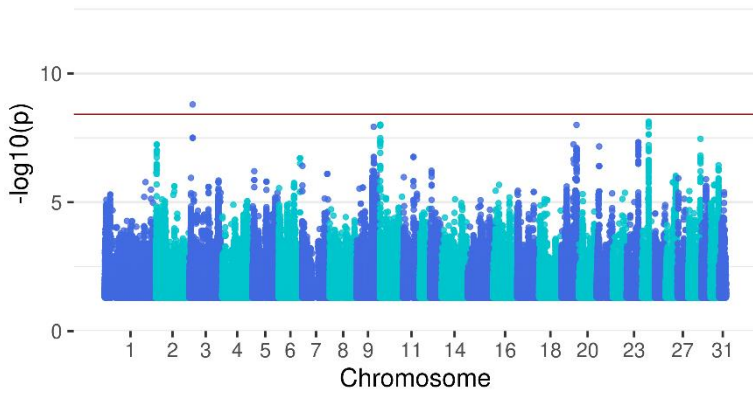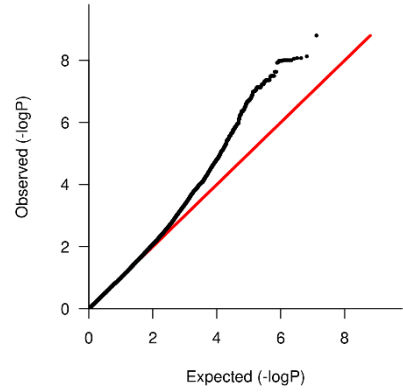

$\lambda = 0.996$

**Fixed effect: top SNP from GWAS withers height (rs68603062)**

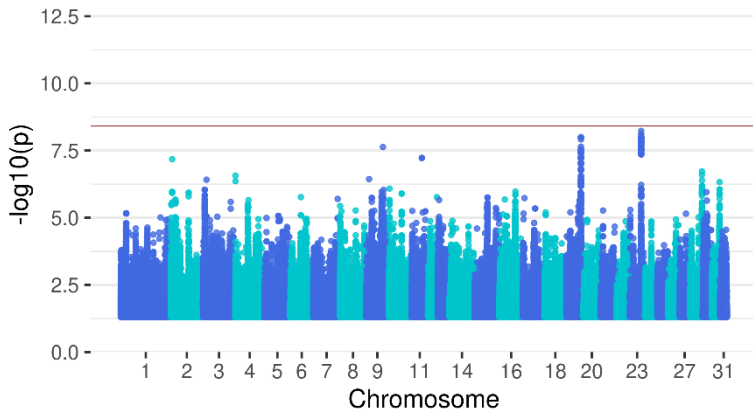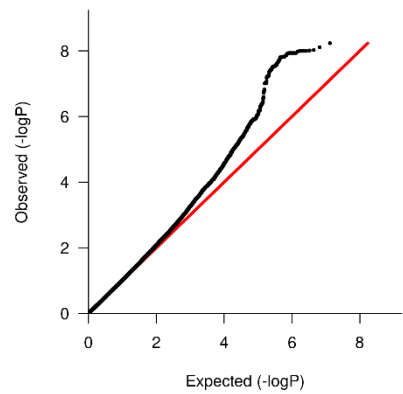

$\lambda = 1.016$

**Fixed effect: own top SNP from GWAS (ECA3: 107,211,701 bp)**

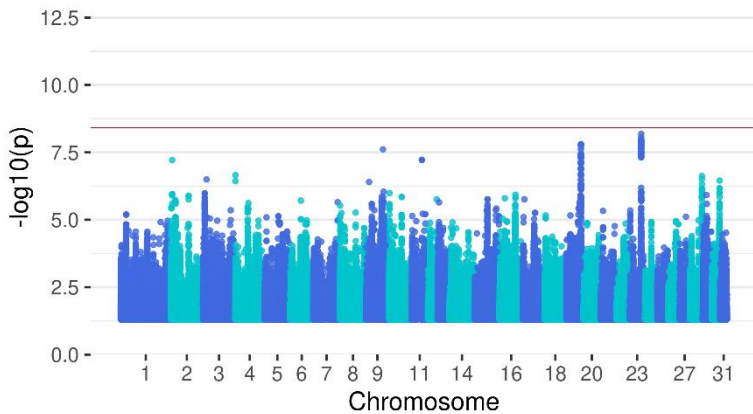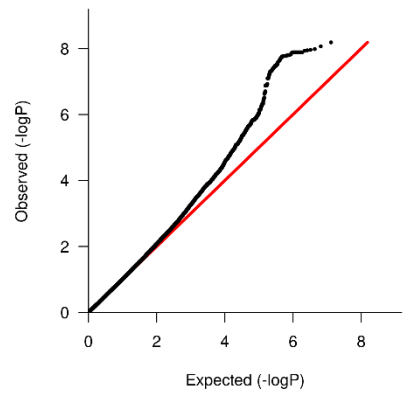

$\lambda = 1.014$
