# Supplementary material for: Genomic analyses of withers height and linear conformation traits in German Warmblood horses using imputed sequence-level genotypes
Source: Springer Nature journal article supplement (doi:10.1186/s12711-024-00914-6), 2024-06-13

**a**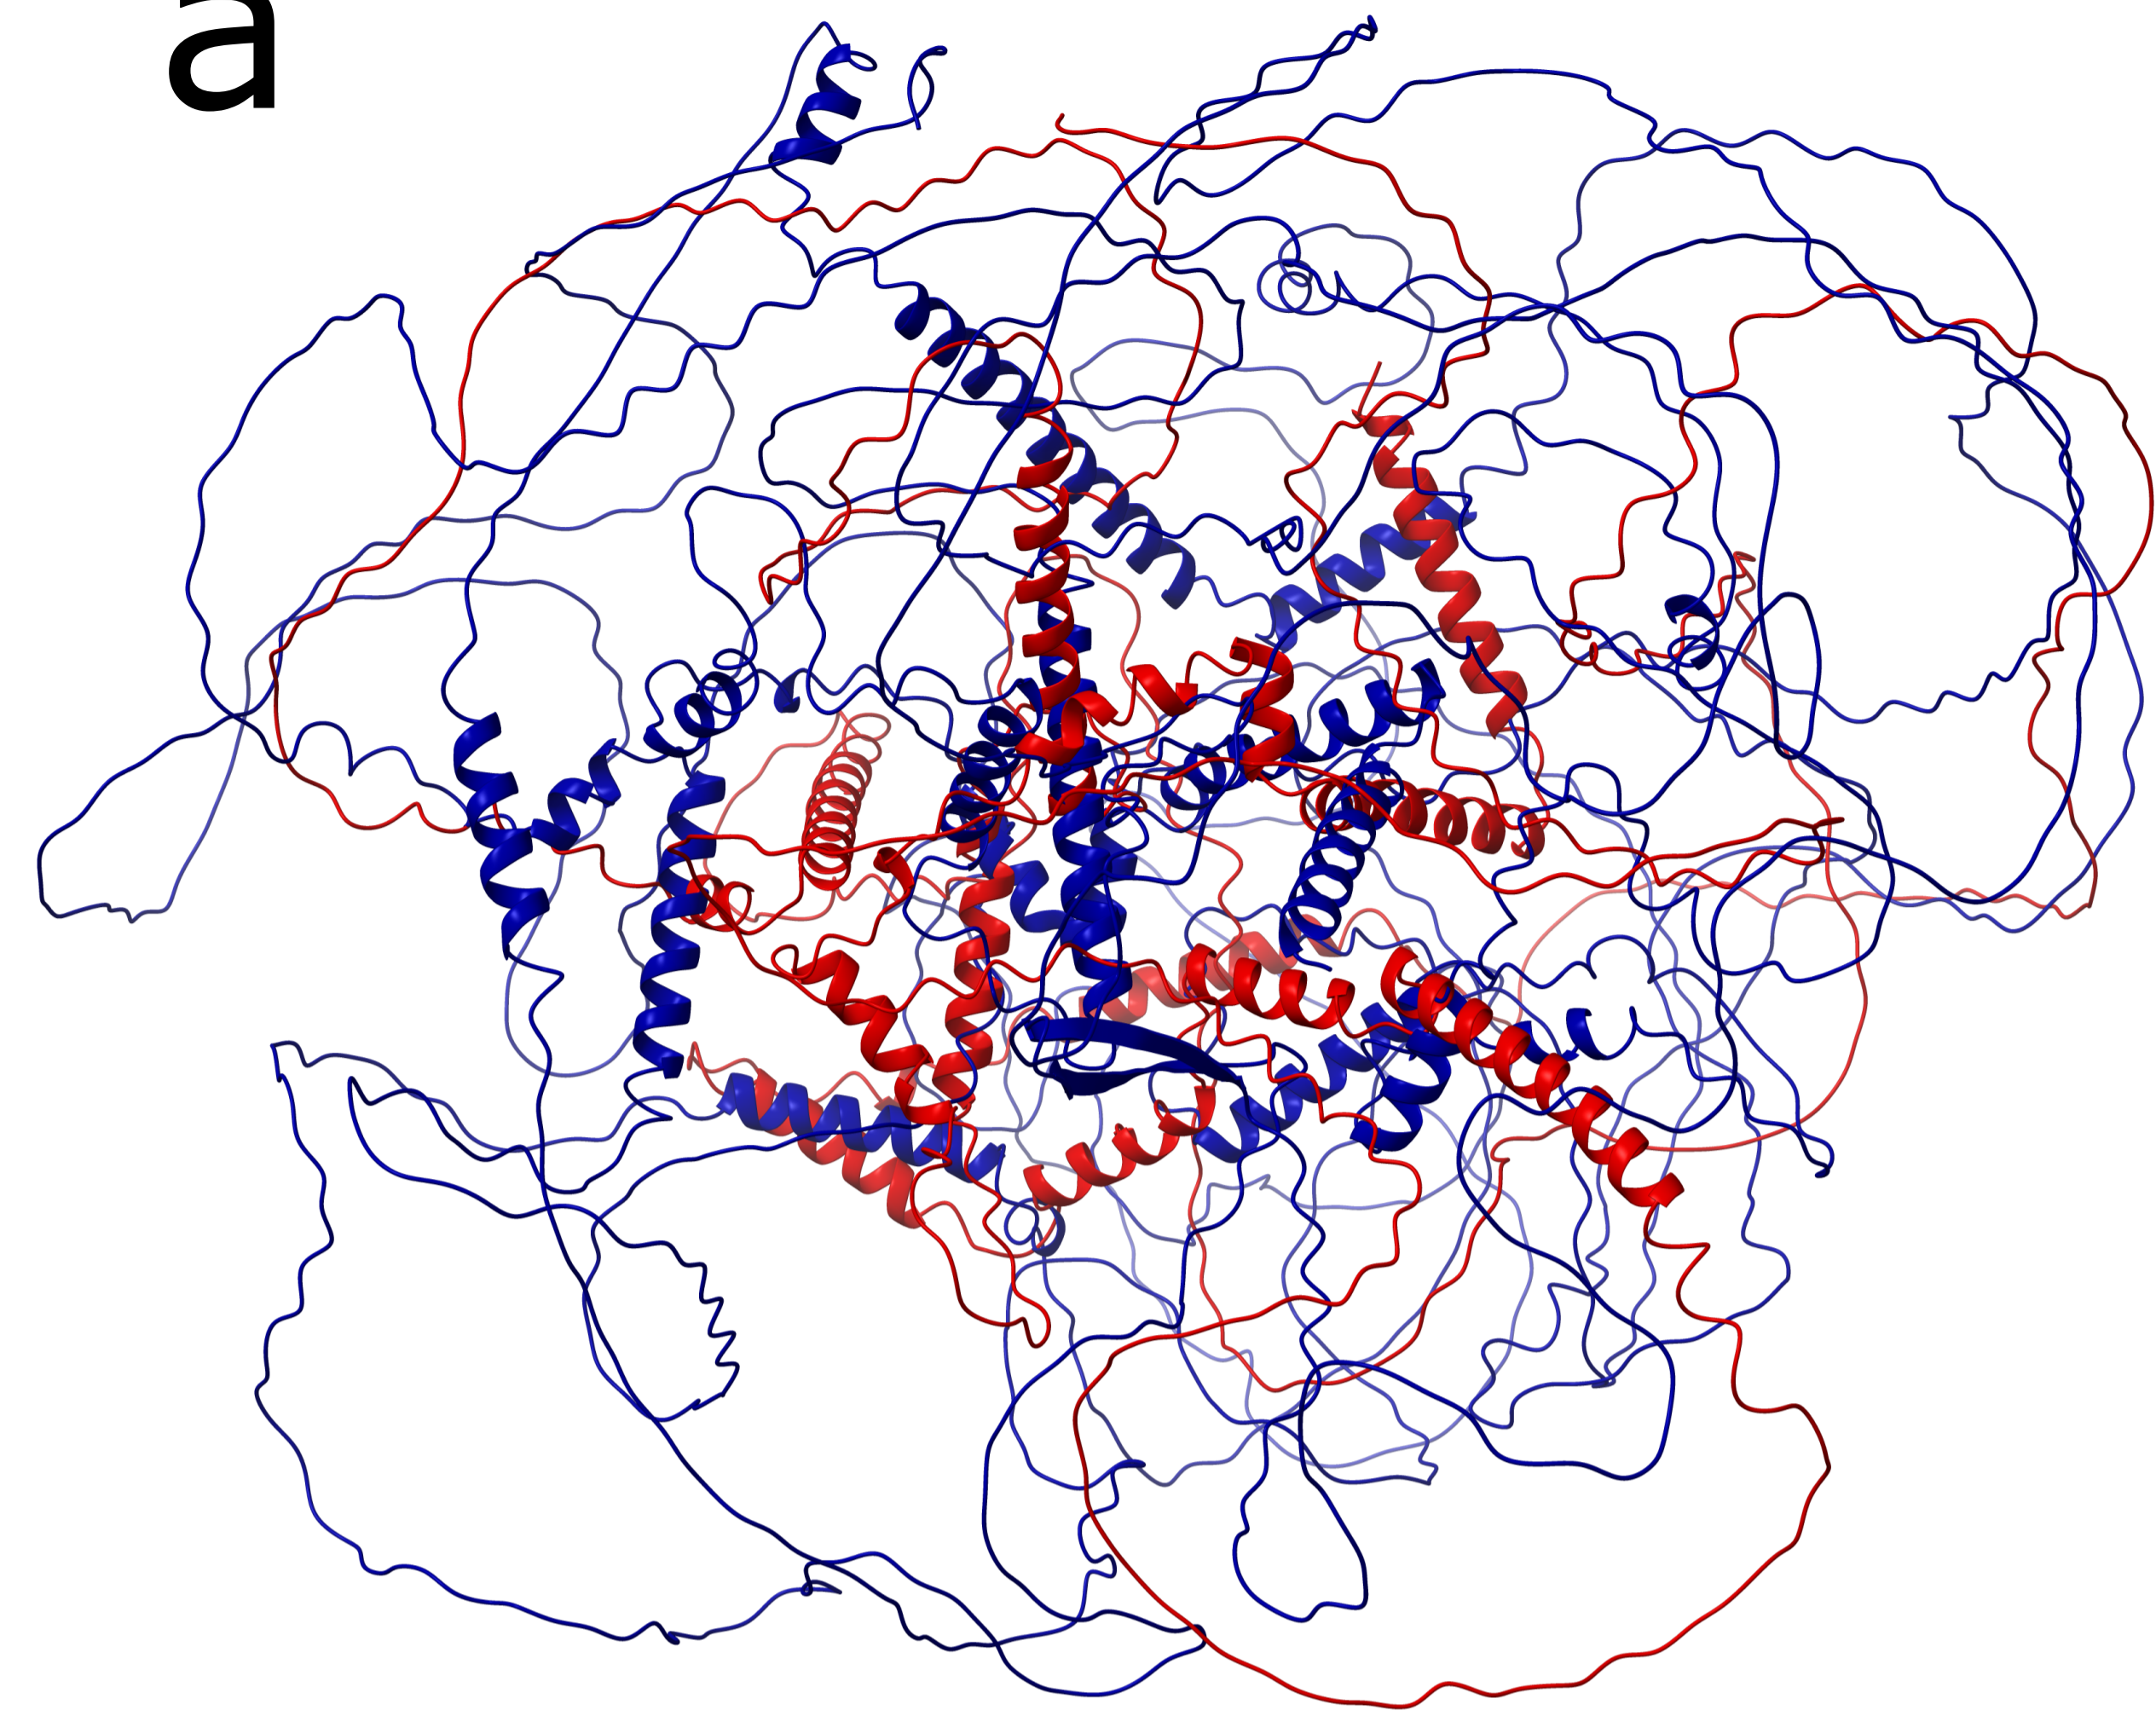**b**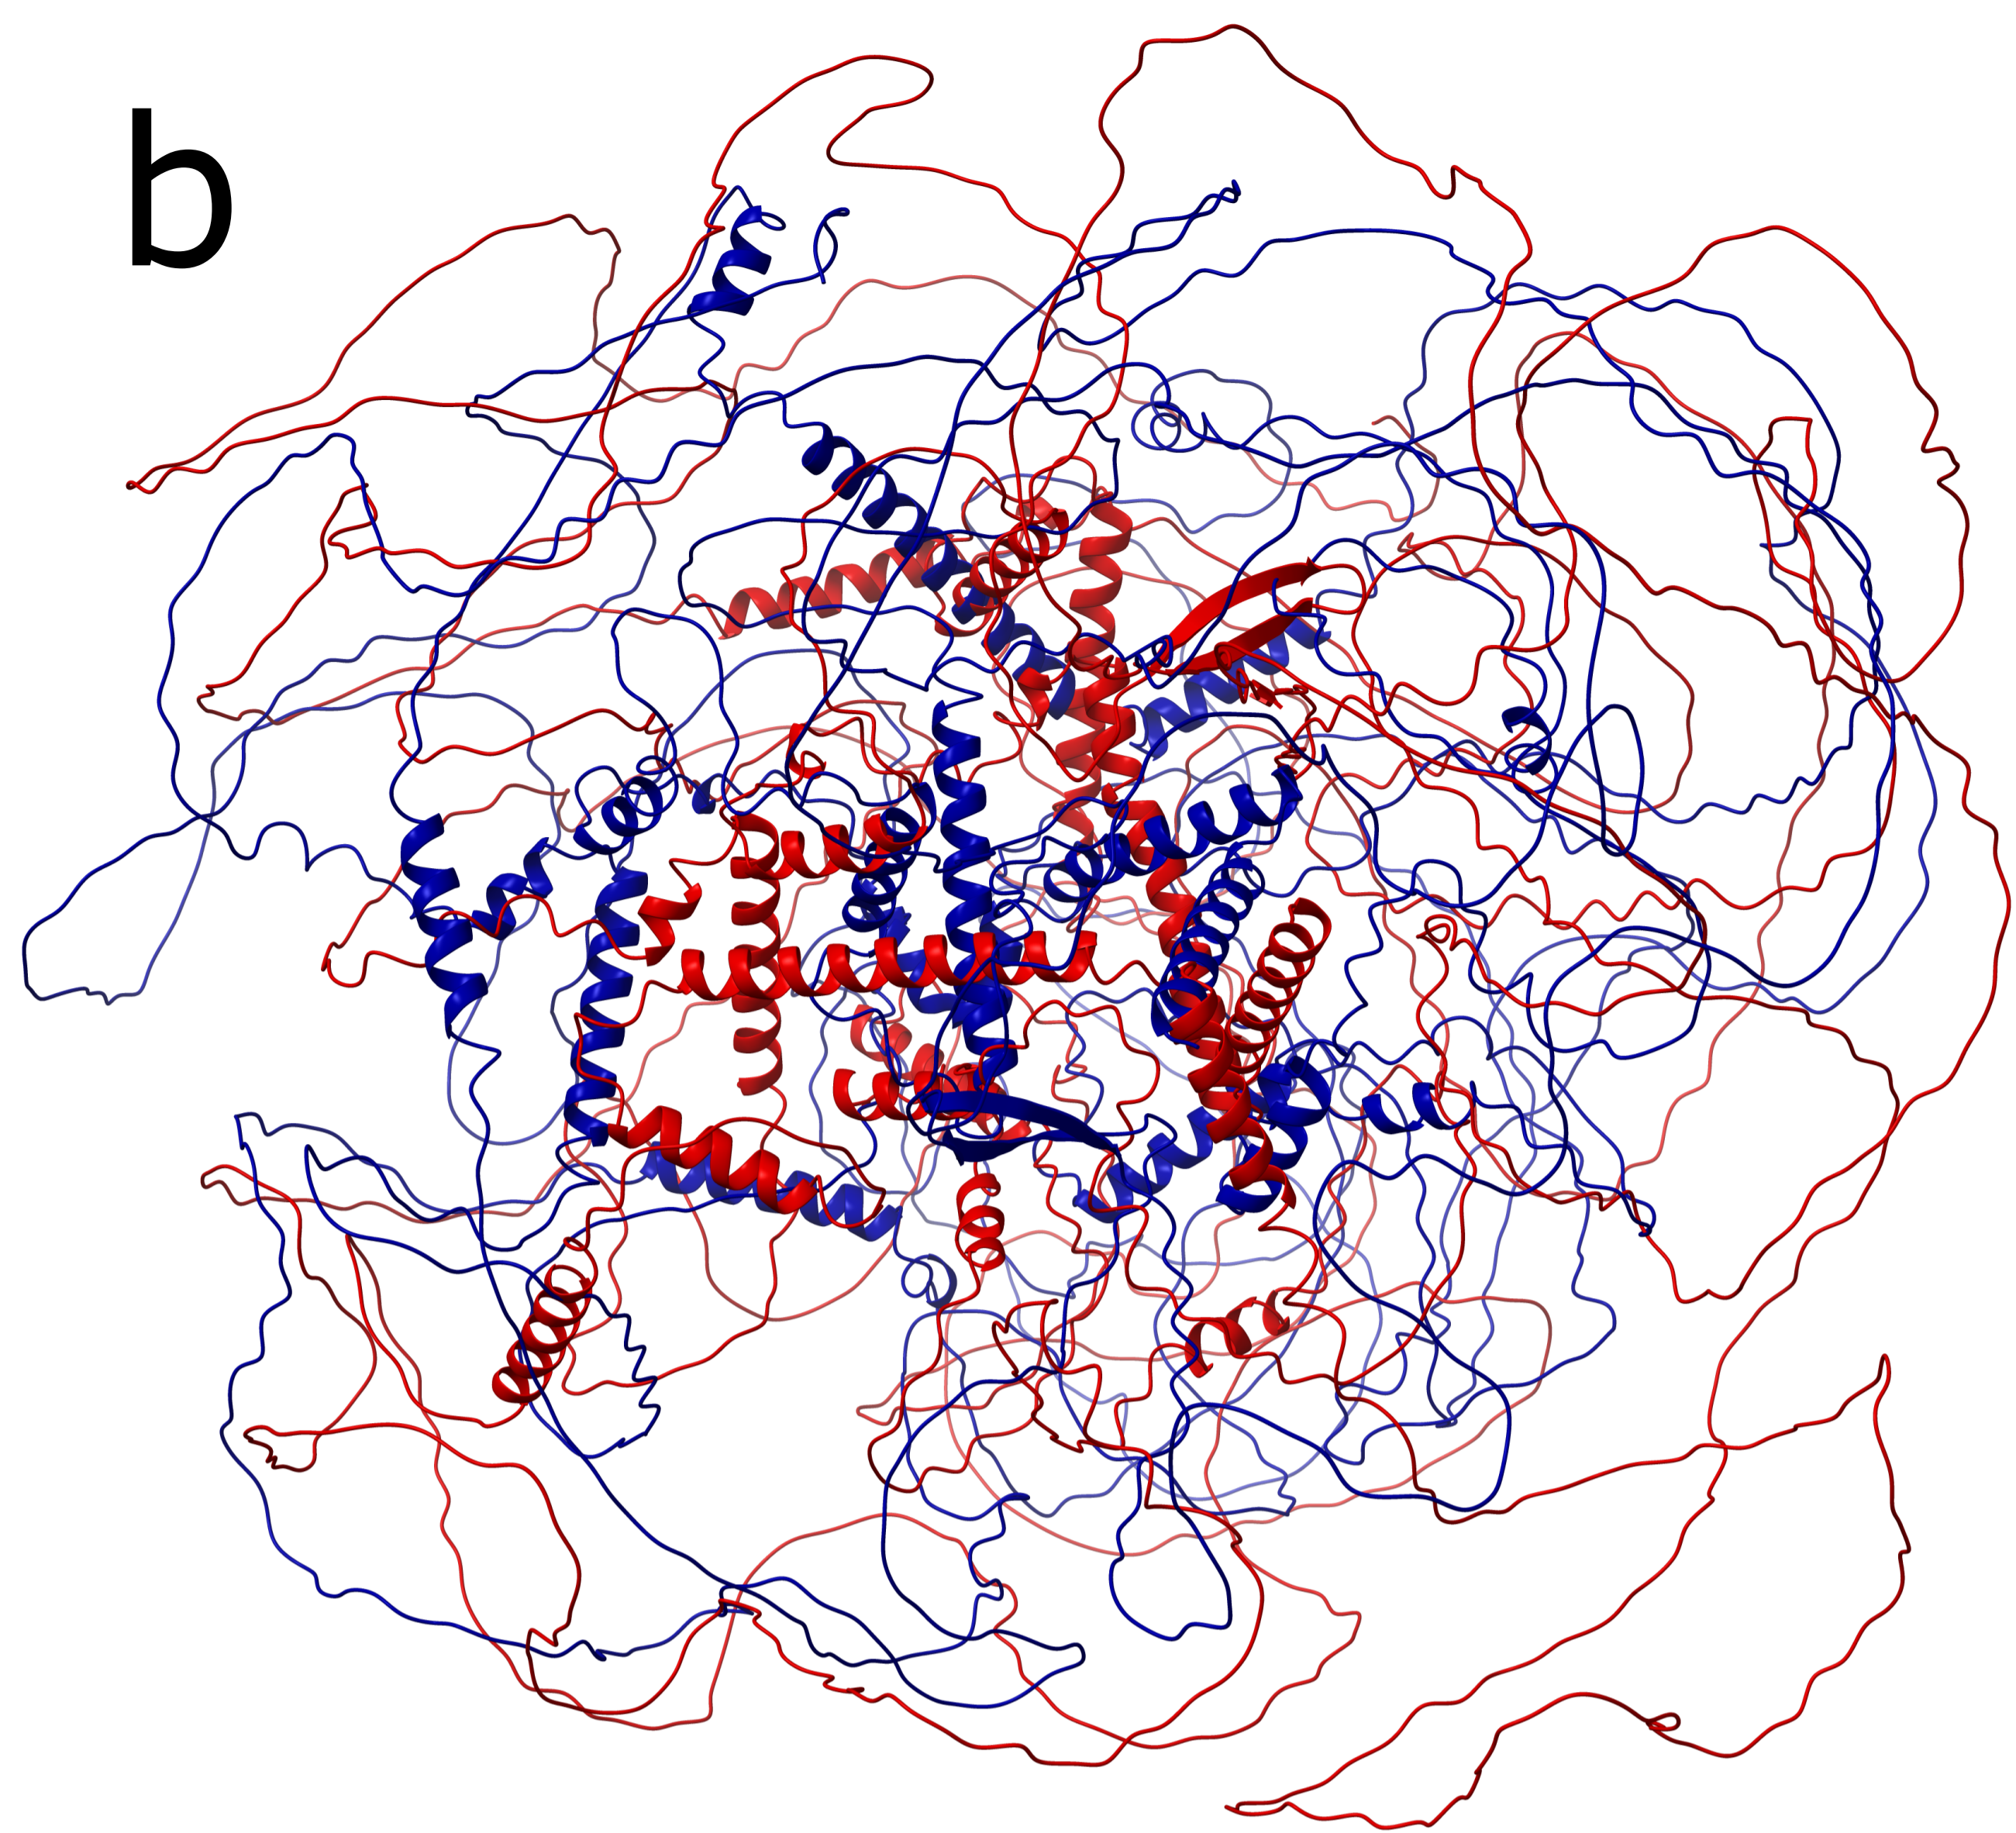**c**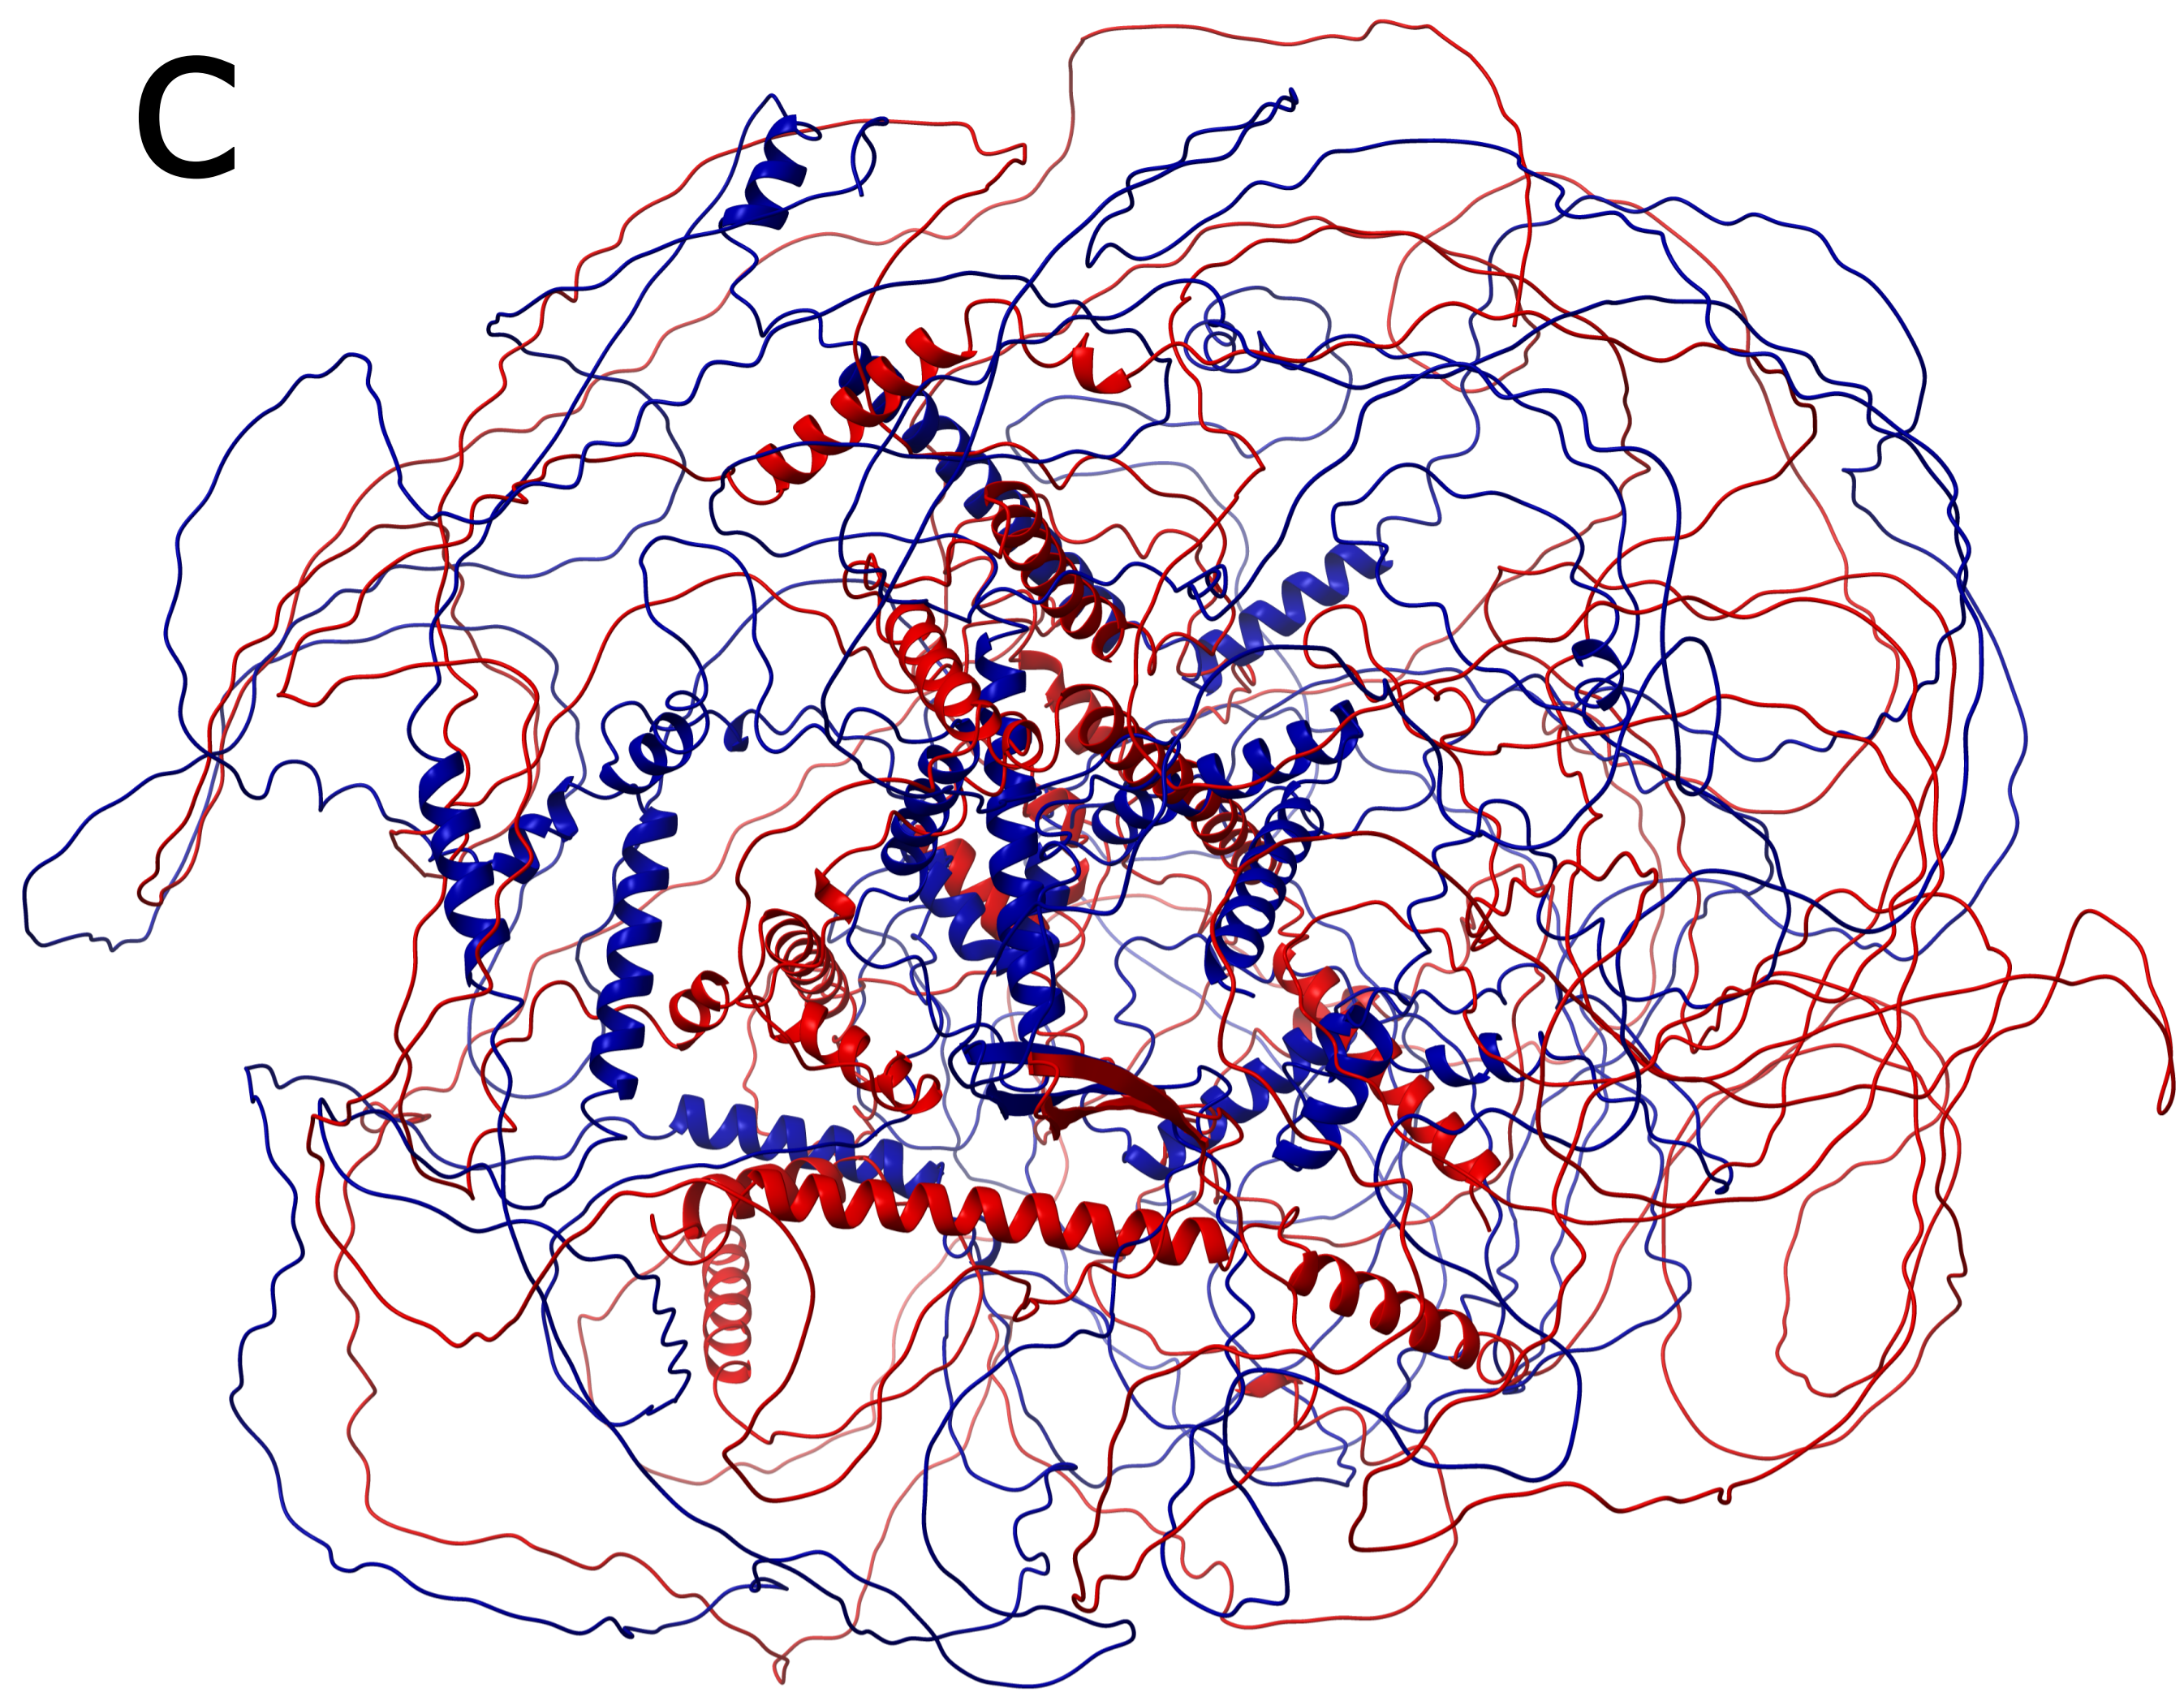**d**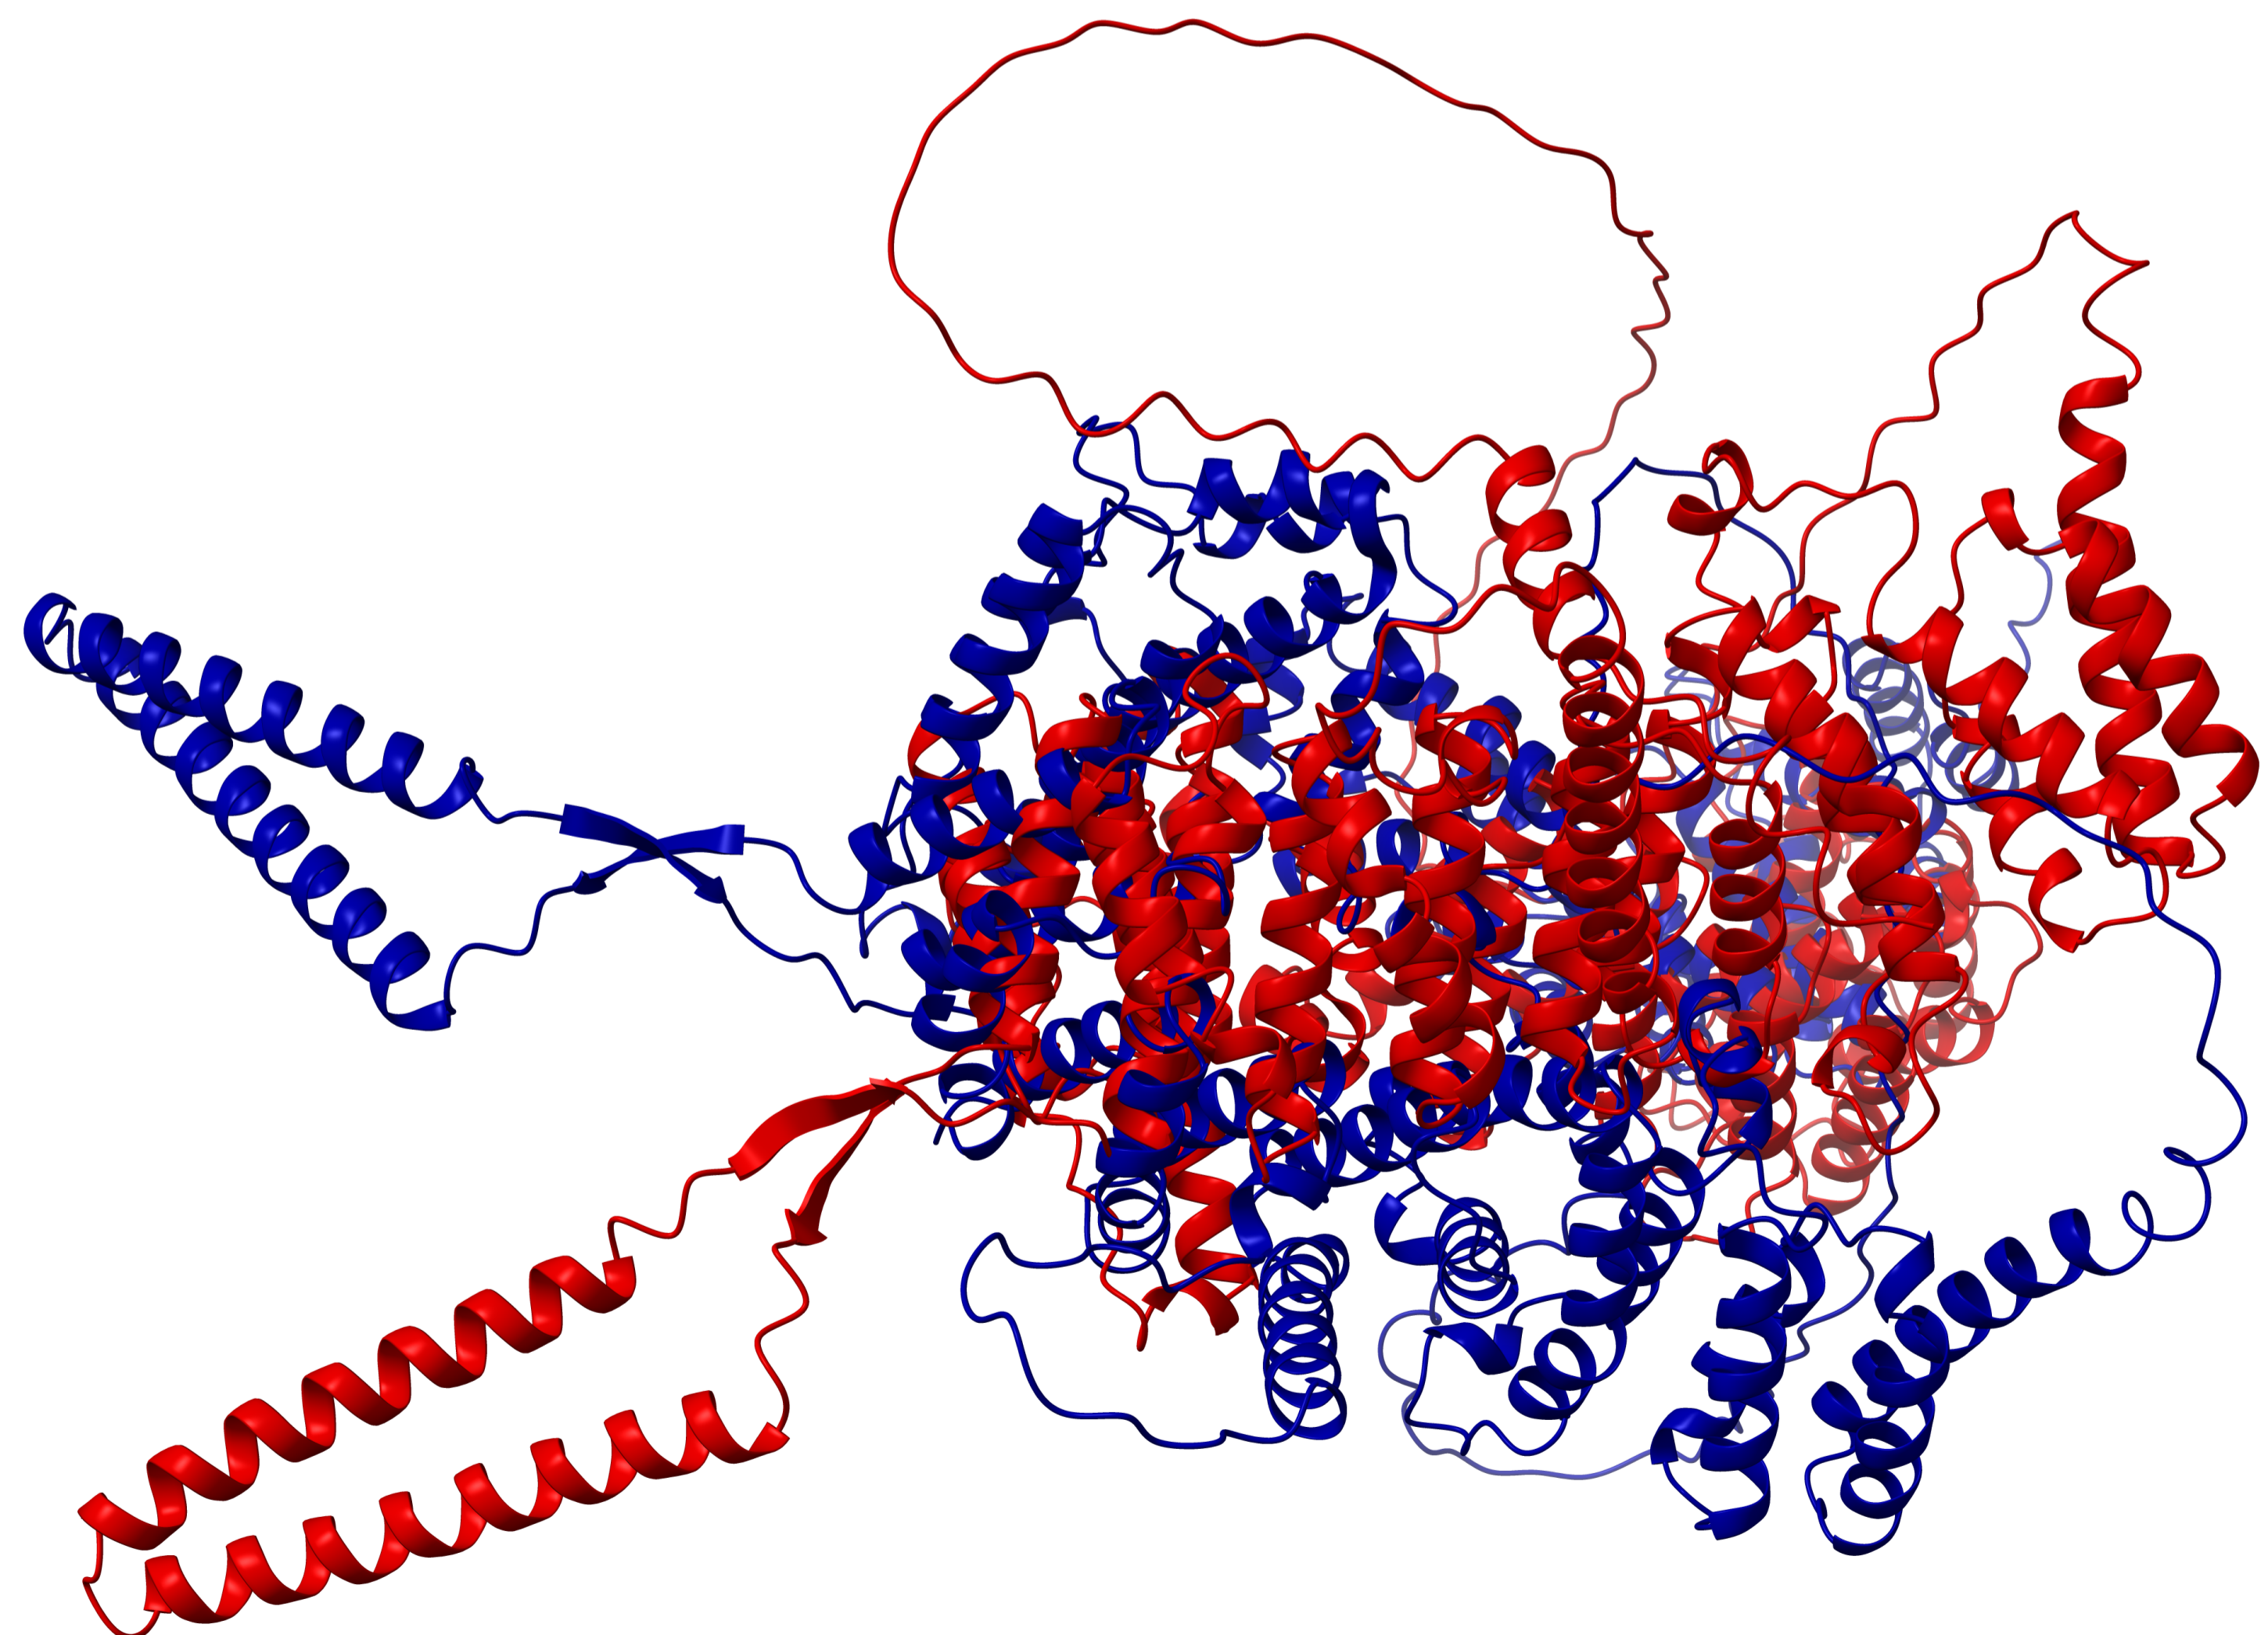**e**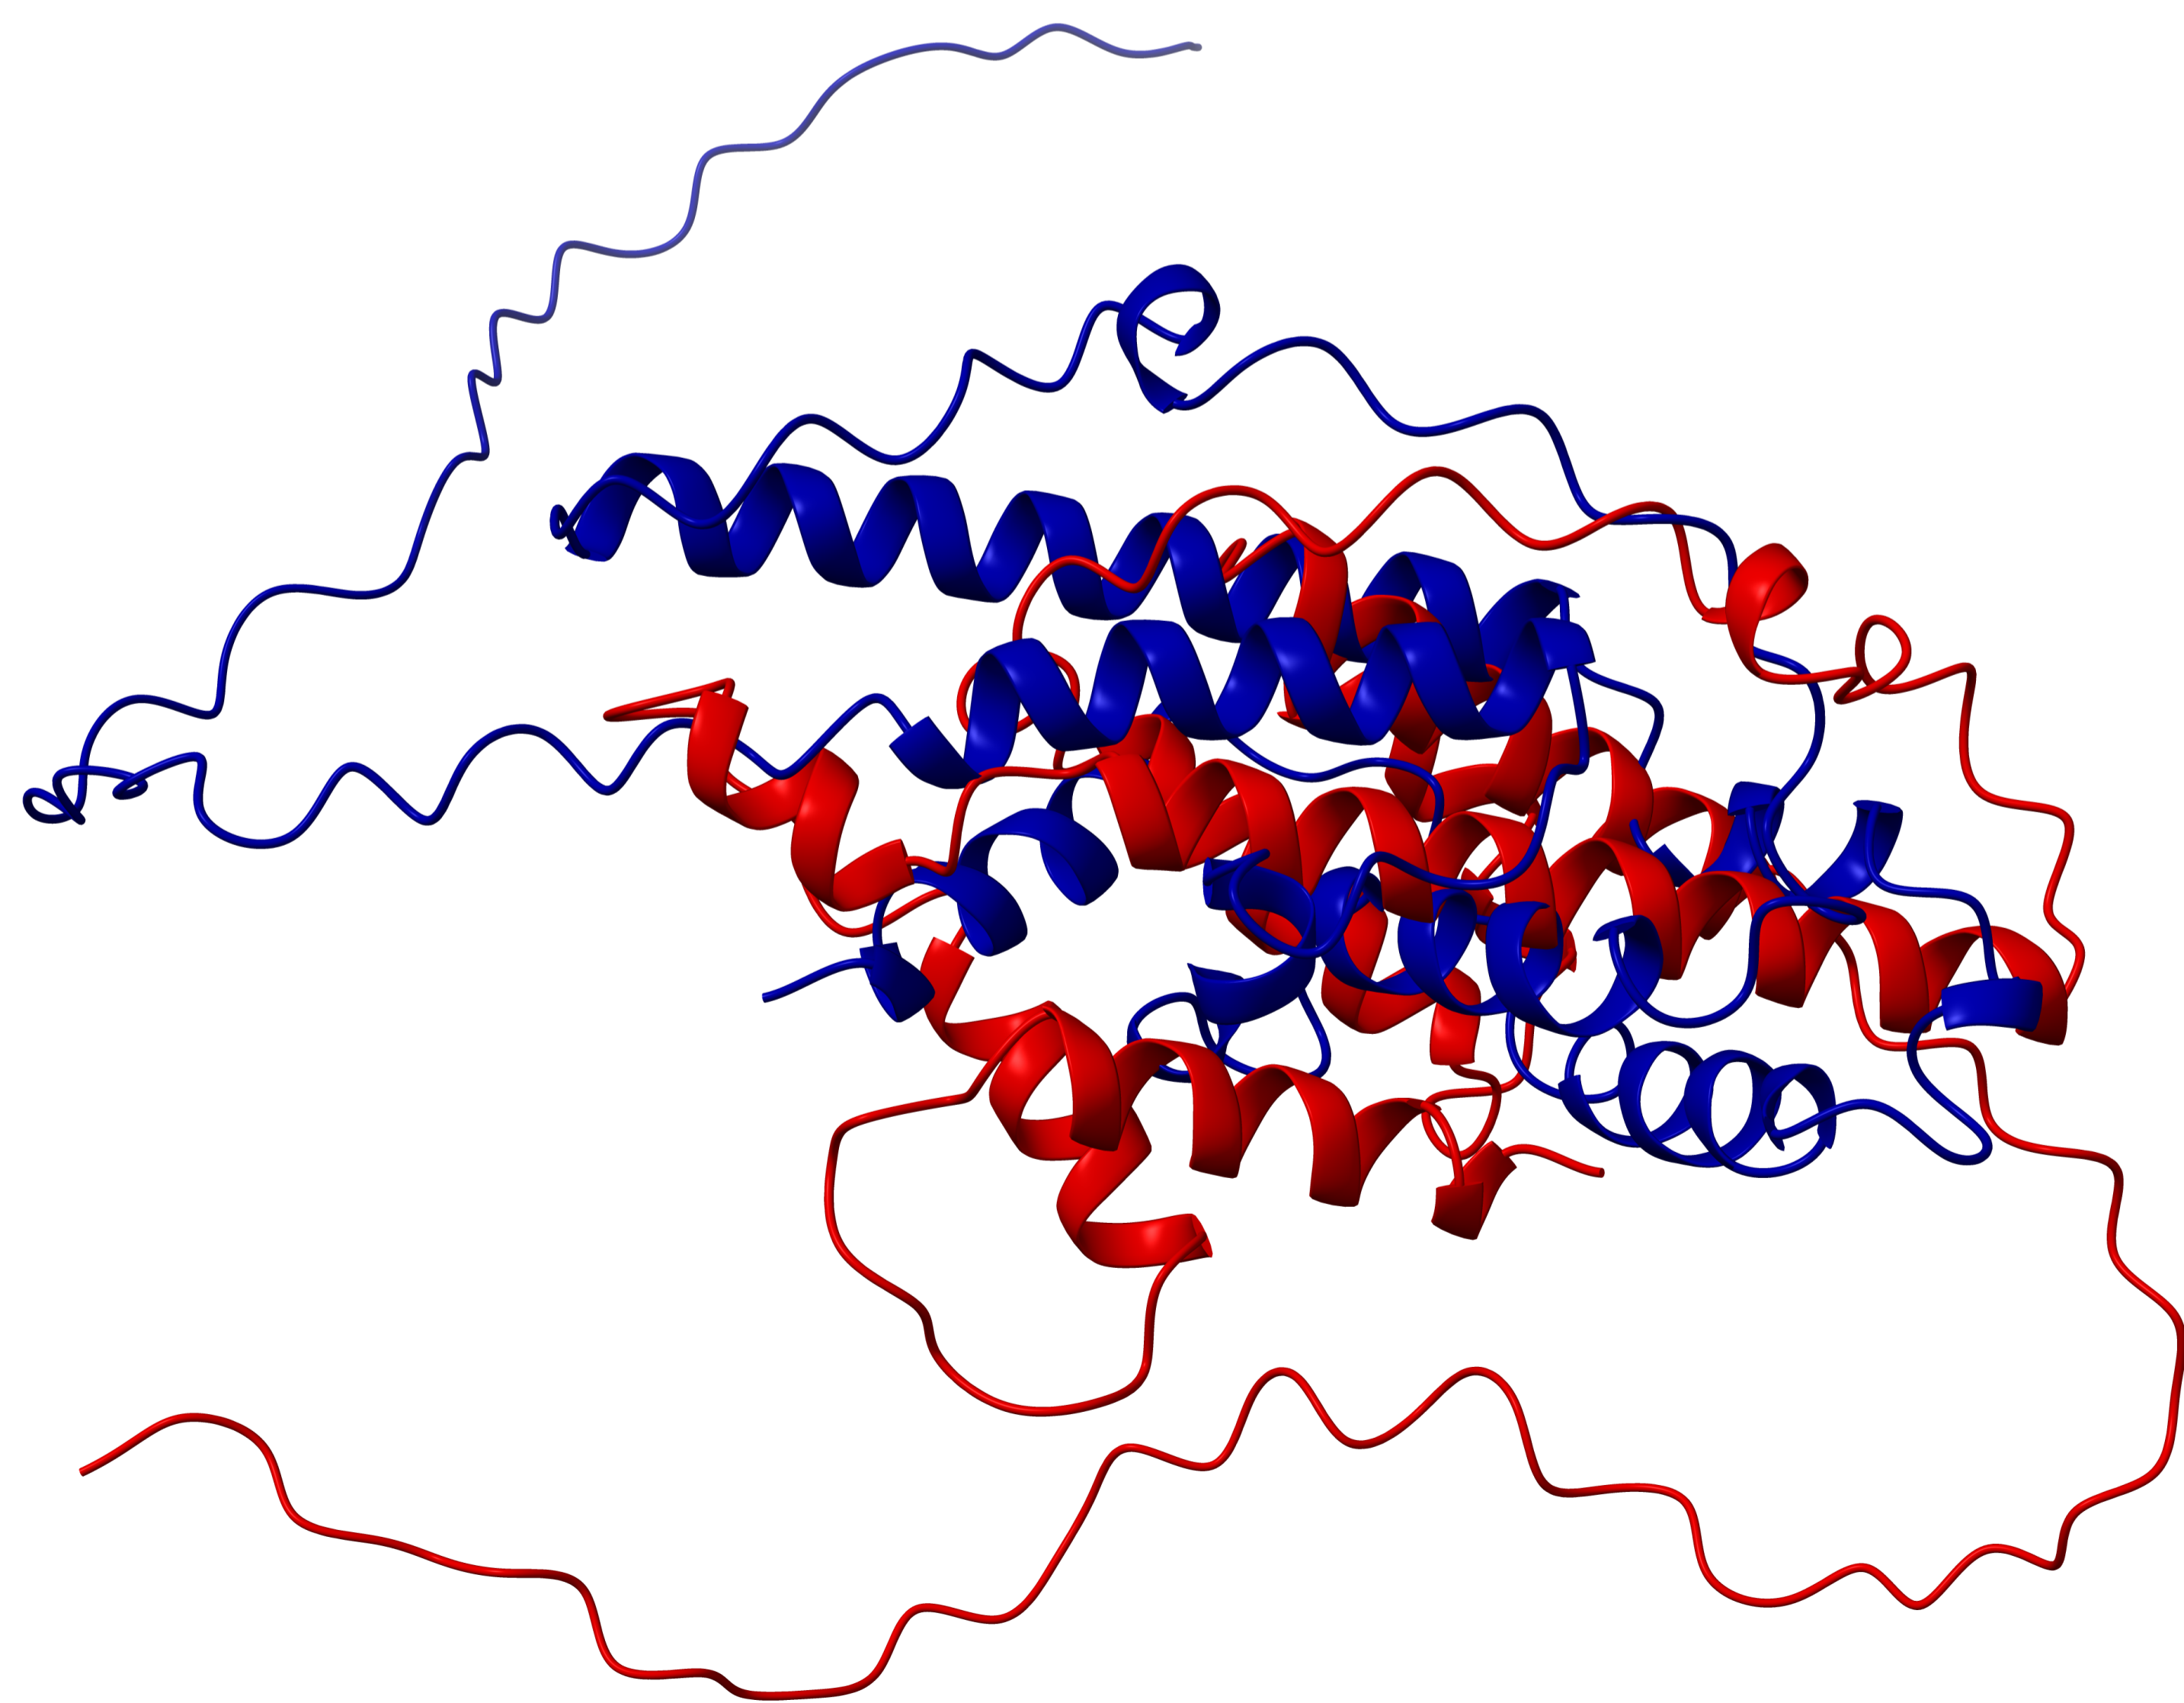

Supplement: MOESM12 [file 12711_2024_914_MOESM12_ESM.pdf]
